# Supplementary material for: Effects of experiencing the COVID-19 pandemic on optimistically biased belief updating
Source: eLife. 2025 Jun 30;13:RP101157. doi: 10.7554/eLife.101157 (PMC12208662; doi:10.7554/eLife.101157)
Supplement: Figure 1—figure supplement 1—source data 1. [file elife-101157-fig1-figsupp1-data1.xlsx]

## Sheet: Figure_1-figure_supplement_1
Figure 1 - figure supplement 1	Belief update intra-subject
bad news		good news
before	during	before	during
8.33333	46.9333	14.8148	-9.72222
23.3	5.23077	22.95	5
2.52174	5.73913	26.7647	3.76471
4.17241	0	19	-0.833333
-0.4	9.63158	13.3333	14.4286
2.62069	4.75	10	5.0625
10.7273	18.6452	9.33333	9.55556
0.44	0.25	4.64286	0.25
13.4706	13	17.5	4.09524
1.89286	8.95652	12.5	2.1875
8.25	46.2593	12.7895	-26.9231
2.28	11.6207	23.9286	14.7
3.75	36.5185	18.8235	-23
7.62069	-0.111111	11.3636	-0.1
20.1667	4.6	6.63636	2.21429
-1.77273	-0.666667	12.7059	0.863636
3.82353	2.40909	4.34783	4.41176
1.15152	13.4545	16.6667	13.4118
14.1364	0.296296	14.6111	5.09091
7.14286	11.8529	14.1765	6.8
7.86667	1.74286	17.5	-0.5
1.92308	7.7619	17.5	13.5263
14.8	-0.764706	11.5	2.31818
1.69565	1.25	15.8824	3.51613
1.66667	1.36364	9.22222	3
1.4375	3.4	23.0417	2.75
6.73684	3.41379	2.8	2.09091
4.58333	2.92	18.1786	5.14286
