# Supplementary material for: Effects of experiencing the COVID-19 pandemic on optimistically biased belief updating
Source: eLife. 2025 Jun 30;13:RP101157. doi: 10.7554/eLife.101157 (PMC12208662; doi:10.7554/eLife.101157)
Supplement: Figure 1—figure supplement 2—source data 1. [file elife-101157-fig1-figsupp2-data1.xlsx]

## Sheet: Figure 1 - figure supplement 2
Figure 1 - figure supplement 2	First estimate
oneself		someone else
outside	during	outside	during
50.125	12.8	49.15	21.025
32.7	35.65	37.575	40.325
32.025	40.3611	36.475	41.0571
26.475	27.5	28.775	35.2
48.15	41.375	46.525	41.85
28.1	37.6923	33.15	42.2
34.75	23.15	41.2	20.1
28.55	46.975	33.475	48.675
48.75	23.525	40.925	28.2564
28.55	40.5	31.9	50.025
42.25	26.425	38.275	30.425
29.4	35.7879	31.525	37.15
29.975	44.05	35.375	43.9
37.8	36.5152	38.4	27.275
39.625	16.6154	40.75	25.4
26.975	33.65	38.975	35.4
59.85	28.65	58.8	31.95
39	55.9444	41.5	40.85
46.375	57.3611	44.1	41.025
24.9	40.975	29.825	32.95
39.15	34.3077	41.925	33.975
34.35	53.7692	36.425	54.2564
53	32.275	49.625	32.025
35.625	42.15	33.875	28.925
32.4	46.8	33.225	46.3
37.275	38.6	40.55	39.35
42.125	41.4	39.125	42.7
46.925	26.0333	43.225	22.8158
41.775	39	37.825	44.8462
49.4	12.45	41.825	22.525
39.725	26.85	39.85	31.35
29.825	32.8	38.8	45.725
47.775	39.4	39.725	39.275
58.125	32.2308	50.8	37.3077
42.45	29.225	43.85	31.475
30.475	43.3333	27.9	45.8
41.975	39.05	40.45	42
29.95	40.7	35.35	41.825
32.975	36.3077	41.5	38.6
35.325	41.75	32.4	42.825
34.55	42.275	35.55	42.85
33.975	38.9	36.625	36.55
49.975	21.75	54	29.625
42.525	33.1	42.05	38.825
27.825	47.55	33.25	34.8
49.95	56.3	52.675	56.35
26.8	30.025	30.925	28.65
31.8	45.0526	43.125	33.25
32.25	28.925	32.25	36.925
27.95	47.3	38.55	43.2
39.675	35.975	44.2	42.525
26.05	34.75	37.575	43.05
33.575	17.675	35	22.775
40.525	22.5641	45.25	32.625
40.025	41.625	43.275	44.125
28.7	42.45	30.975	40.6
44.375	45.675	44.9	47.875
32.4	16.875	38.8	25.3
	13.425		25.45
	29.8649		33.55
	60.55		63.25
	24.525		25.375
	31.4615		35.65
	27.4595		31.85
	52.25		50.975
