# Supplementary material for: Effects of experiencing the COVID-19 pandemic on optimistically biased belief updating
Source: eLife. 2025 Jun 30;13:RP101157. doi: 10.7554/eLife.101157 (PMC12208662; doi:10.7554/eLife.101157)
Supplement: Figure 1—source data 1. [file elife-101157-fig1-data1.xlsx]

## Sheet: Figure 1
Figure 1 a	Belief updating bias					Figure 1b	Belief update				Figure 1b	mean modelled belief update					Figure 1c	confidence rating in base rates			Figure 1d	Estimation error
						bad news		good news			bad news		good news								bad news		good news
October 2019	March-April 2020	Mai 2021	June 2022			during	outside	during	outside		during (bayesian)	outside (RL)	during (bayesian)	outside (RL)			during	outside			during	outside	during	outside
6.48148	30.5	6.36667	3.92481			-0.5	8.33333	30	14.8148		8.02234742771379	4.92395558703921	8.87355409328153	11.6330817911432			73.725	87.975			31.5263	19.9167	55.5	23.7037
-0.35	13.3958	3.08421	13.8125			0.791667	23.3	14.1875	22.95		6.12954654172143	10.3322737774315	7.53405397850988	13.7322809483303			75	48.125			25.9583	36.6	28.125	22.15
24.243	8.07857	5.92732	-26.3846			3.85	2.52174	11.9286	26.7647		7.27730712361734	5.00349407916590	6.55682373788566	11.4165421547838			67.5882	86.5			22.2857	31.8696	35.2857	24.2941
14.8276	-15.7037	11.7059	0.696078			3.25926	4.17241	-12.4444	19		5.63882246686776	12.1077182042470	5.98805586285877	12.9157672281404			69.15	33.75			23.5	27.2069	17.6667	24.4
13.7333	8.77694	-1.07143	6.02525			7.38095	-0.4	16.1579	13.3333		8.66079741049193	10.4032137610331	6.77149546375979	12.4386384507773			68	60.075			26.0952	26.0667	31.7895	30
7.37931	18.2203	5.91316	-1.52857			2.91304	2.62069	21.1333	10		5.78444719548800	6.39540687453598	4.34701173685044	13.7510360947271			93.4	75.675			23.2609	25.3793	28.7333	25.9
-1.39394	-23.6562	4.84759	15.7368			17.4062	10.7273	-6.25	9.33333		5.32680898587500	12.8582087121534	7.05136317949816	14.2462652857361			65.325	85.5			26.9062	27.3182	23.5	21.5
4.20286	2.92286	-18.9278	1.41667			13.3571	0.44	16.28	4.64286		7.14714671156063	9.53331275049728	4.88832018003340	8.91264244141822			84.25	78.5			21.4286	25.32	23.2	12.7143
4.02941	-86.8182	-9.87446	2.4538			57.4848	13.4706	-29.3333	17.5		3.80195551200086	8.71514702696611	3.58333687700240	11.7050830352930			74.875	80.5			24.0303	21.8235	22.5	32.7273
10.6071	25.2525	23.7708	0.226667			0.636364	1.89286	25.8889	12.5		7.64904786255616	4.52739200036962	6.67661568266006	9.37950081879608			57.425	61.625			25.1364	25.6071	31.8889	21.25
4.53947	-3.68025	-1.09207	-45.6196			8.86207	8.25	5.18182	12.7895		6.82023824499274	4.39412446700605	8.74472505117485	10.3357758803145			66	62.5			28.7586	16.85	26.5455	22.6316
15.119	19.4123	1.12857	13.7855			6.42105	1.16667	25.8333	16.2857		5.15929108961501	8.67539097432486	5.85033274606166	12.9528258816536			91.175	73.575			24.35	33.7083	31.0833	27.4286
2.21368	5.8	-57.0524	-6.78571			-0.4	8.55556	5.4	10.7692		5.17216446105576	10.1187621036856	7.41614611612290	10.5755644620626			51.8	42.125			18.95	29.8889	27.2	30.9231
21.6486	-11.4737	0.916667	5.75192			21.4737	2.28	10	23.9286		5.52333975152190	9.82522286412880	7.50235074886583	12.8189074059906			99.125	62			27.4	22.56	30.0833	34.2143
15.0735	-2.24324	-1.13333	19.1864			2.24324	3.75	0	18.8235		6.40900190689338	7.21617263353588	6.20784466956098	10.9869498340256			72.025	57.55			25.973	20.25	19.5	22.8824
3.74295	-101.741	0.233333	-1.90659			47.4286	7.62069	-54.3125	11.3636		6.32194968813548	5.98134367020324	9.71708462228794	10.8820883138714			93.55	81.325			22.0476	22.7586	13.25	12.2727
-13.5303	-2.83333	-9.16667	3.87338			6.83333	20.1667	4	6.63636		4.22145113582171	7.72914754693071	4.41524396727957	12.9044161787310			90.05	53.25			25.1	16.8333	30.2	27.2121
14.4786	-35.4048	-0.904762	0.056266			50.5	-1.77273	15.0952	12.7059		5.93811422154932	7.63363805389051	6.34175859370158	11.6398359311406			78.6667	66.875			22.7692	21.1818	37.1739	25
0.524297	17.513	8.7027	1.86667			14.2143	3.82353	31.7273	4.34783		5.12751970539377	7.11536678728882	5.28274948492796	15.3250927592294			80.375	55.275			26.2857	30.0588	45.2727	33.1304
15.5152	11.6061	1.94167	7.88088			2.16667	1.15152	13.7727	16.6667		6.13829571419019	8.32784735391687	7.03438155951593	14.0594141063907			76.9	60.5			20.7222	21.1212	18.8636	16
0.474747	13.7662	2.21053	5.35			11.0909	14.1364	24.8571	14.6111		9.68351354575302	11.2219601482908	4.46997625950614	11.0047878567845			88.125	65.65			26.6087	21.0455	26	23.7778
7.03361	-46.4286	-1.19048	8.4023			44.5	7.14286	-1.92857	14.1765		4.63408473751728	5.82663136446608	6.67787343147574	8.90630741619257			65.225	63.175			20.6364	26.3333	27.8214	19
9.63333	3.75084	3.86667	1.20833			3.7037	7.86667	7.45455	17.5		3.52718539427842	10.4975015958088	7.74019544077108	13.3593357242449			84.575	68.35			21.4444	20.1333	24.6364	34.375
15.5769	0.326316	-9.17059	7.86189			10.2	1.92308	10.5263	17.5		5.72913222127110	8.29319940834538	7.04443030781782	16.1412609372546			81.625	48.875			28.7	17.9231	34.7895	20.7143
-3.3	2.61667	-0.756757	20.075			3.46667	14.8	6.08333	11.5		8.29741984892075	9.09636085648821	6.05523798407246	9.62570814441730			67.925	70.375			23.8667	23.36	26.2917	23
14.1867	-1.05	-42.1265	10.75			12.4	1.69565	11.35	15.8824		7.09239784934174	7.28076742995830	4.61112475395008	13.1832062474525			87	60.625			18.15	18.8696	15.4	19.2941
7.55556	1.94737	9.40323	24.6056			8	1.66667	9.94737	9.22222		4.86374440884962	6.84150426142213	6.30094465329609	12.6132925640033			75.4	54.125			20	22.9524	23	31.4444
21.6042	10.0977	13.3438	10.9167			4.47368	1.4375	14.5714	23.0417		7.28279339142155	10.2057136681364	6.31055384122856	12.1717951403788			79.6	11.025			34	28.6875	45.1429	30.5
-3.93684	2.84874	1.37179				9.85714	6.73684	12.7059	2.8		7.18031756681765	8.22741780625673	4.95111381953695	8.36608655379159			72.6923	71.2			23.1905	23.5263	27.7059	26.05
13.5952	6.92105	11.1259				1.57895	4.58333	8.5	18.1786		4.23435326774701	9.09152702654823	7.41978737999944	13.1005689618744			83.75	61.225			30.3158	28.5	25.5	25.6071
	5.15476	1.92063				0.678571	-1.21053	5.83333	2.71429		3.47183351634550	9.18193155395587	4.67823841452455	11.6367132071903			53.875	25.775			28.8214	28	23.5	24.619
	-15.2853					13.3478	3	-1.9375	16.8125		6.76542249863501	7.51073408956016	6.44468369162013	11.6451795646505			66.125	48.225			25.1739	34.1739	18.25	23.875
	-1.28889					7.88889	20	6.6	-6.38462		2.08898439995690	8.11466641838259	4.65509225534939	9.10783844808321			66	67.575			20.0556	18.8462	16.9	21.5
	-19.1969					16.12	11.3333	-3.07692	12.0294		9.16853863037427	6.82275699147955	6.30280365549474	14.5570515855770			62.075	50.6			23.8	21.8333	24	25.0588
						4.13333	10.1111	10.5	16.1364		5.27124854499669	8.77678028429821	3.62317605354244	9.15512491548186			78.2	89.975			18.4	28.5	12.2	27.5909
						6.6	5.6	9.68421	4.07143		5.51397940593261	5.77231211764822	6.21059849056584	12.1488452792204			62.75	64.45			22.75	22.6	31.3684	12.8571
						11.8095	0	17.7368	15.7368		5.53948899732510	9.22390566665418	7.07428900807173	6.89318490200634			92.15	70.275			24.9524	21.8333	25.6316	24.6316
						7	15.25	18.7059	16.6667		7.75804713484444	8.40688134306612	7.12703937095170	11.3605625719580			81.525	35.35			25.7391	25	36.5294	12.9333
						1.90476	8.6087	0.833333	11.0625		6.07442741626873	6.43124530644820	6.04688434685566	11.1214781720916			63.025	69			27.7619	30.5217	22.8333	26.25
						5.35	1.84	11.2632	2.06667		6.88307350110981	9.69288232278176	7.74170836614244	14.8547049090670			65.425	52.375			26.9524	19.28	33.5263	19.8667
						7.47059	32.8696	12.3182	-12.75		5.86717559796382	13.2357880640065	4.97685656528683	12.7343422178148			68.25	70.3			20.9412	21.6522	20.3636	17.6875
						15.0455	6.34783	-3.88235	20.1333		4.73914192391169	5.25908584363516	5.74158410953673	12.6361653140650			77.75	64.25			20.913	28.3913	25.7647	27.4
						44.303	16.5	34.4286	9.71429		6.98634878427344	10.7890065357040	6.13012044761317	12.3251939533788			58.025	65.025			31.2121	26.0833	43	25.2857
						2.04167	23.1176	25.8125	28.8696		4.65206001382128	6.93083940237917	7.28128821619495	10.1433392681830			97.3	59.475			28.7917	26.1765	26	23.8696
						4.35294	5.25806	3.26087	24.4444		5.36918222959880	7.93737397609127	7.54073958253077	11.0307791228837			67.725	51.275			17.3529	24.5806	26.087	30.4444
						2.07143	10.2143	3.2	8.30769		4.15584959431448	6.15882773299759	5.29247391826532	11.4579569925537			93.1579	46.025			21.5714	19.7857	36.8077	25.9231
						61.6774	6.03571	4.625	9.90909		6.89224711496965	8.77074437128953	2.64273896194311	11.7245483370552			85.725	65.575			22.2581	33.75	36.75	38.1818
						0.333333	7.82609	1.25	7.88235		4.80288543187530	3.04392561934613	5.89157482810124	10.8006654043558			41.6579	67.5			25.1905	27.9565	44.875	18.7059
						3.23333	7.8	2.1	9.66667		6.20028944215825	8.57385844329781	6.07792023471869	12.1910397357605			69.2	70			20.3333	20.8	17	14.2
						1.26667	3.48276	1.5	11.3636		6.06750999471624	8.17388570994076	5.68111351777922	11.2572397318133			56.175	92.025			18.5333	20.8276	23.875	11.3636
						10.5	1.9	1.33333	7.25		6.40076471985648	7.05276900550449	5.59996900618180	13.5096151963014			60.15	71.125			18.1667	19.1	18.5333	18.6
						6.83333	11.931	5.92857	20.3333		7.56066515199013	6.76075489708455	6.43597786534514	11.0615348914687			69.35	49.35			21.0833	23.4138	21.3571	13.7778
						1.2973	2.45833	10	3.66667		8.04894191963306	7.40759488598862	8.69094142682944	14.3929499320258			50.325	66.5			26.8919	25.9167	35	24.5333
						1.43333	6.52941	3.375	14.3913		7.82517533585874	8.82903898751222	7.23019533200630	11.3380811417793			75.475	65.125			28.8065	27.9412	29	21.6957
						5	7.45833	7.21053	27.5333		7.24198640643707	10.1415179499941	4.82949417183529	12.2229782547453			74.75	80.85			20.3333	19.8333	25.9474	31.7333
						1.66667	3.5	0.47619	14.25		1.38958533494655	9.60900025174795	4.45928325935526	11.0842209147151			60.25	75.7			28.3684	24.6786	30.381	19.5833
						6.13333	1.78571	10	26.3913		8.48977926924486	7.83758334351434	7.31100380344954	11.0028041366662			75.6579	59.475			17.4286	23.9286	31.2632	22.1304
						12.9706	4.5	3.8	15.4167		6.73709772294921	8.77097184696487	4.45451760000197	9.70072556672938			73.45	58.4			29.8286	16.9286	24	14.4167
						0.756757		0			5.33842131229154	3.84235939866687	5.68166882052727	10.8097072409813			64.35				28.2105		10
						31.2174		-10.9091			6.11138507111968	7.34066592341003	8.64589406543194	13.0843214455578			74.75				26.28		26.8182
						15.5		24.9032			6.23358128822130	7.01518746652101	8.02468014756665	11.3824507097259			45.75				10.8889		29.7097
						2.15625		15.5			8.25434599589011	8.81668348498096	5.12300012887481	11.5243976676558			78.85				25.7188		25.625
						7.16667		8.53846			8.50786870617413	5.66112449765922	6.15661643992277	8.96152451638768			78.775				24.8077		25.6154
						5.07407		16.2			7.76874373065054	8.88612927586273	5.32241468478123	11.0580603459168			88.15				22.9259		19.4
						5.55556		7.47619			6.95542900324972	7.06766262768042	5.22890561966131	14.9713529990865			75.975				20.9444		41.3333
											3.60003062208870	9.22575235712285	6.00992997497602	12.0022757148421
											7.75037543101629	9.05573554022570	5.76642940787830	8.68237964953841
											5.10403107211154	7.14628901314529	6.37517686446438	12.6085556356610
											9.20469107187437	11.4439198352661	6.32427999551718	11.3573165803001
											5.89559726231483	7.78843846006058	6.11438678199051	9.32790988477761
											7.24009621764378	10.6323470054302	6.82109734796927	15.5006624430696
											6.20981662019858	10.0934129143238	4.42479848061654	12.7297026594627
											6.37940514349948	7.40491586515419	6.40430652436672	13.8364003746222
											7.25808313073287	6.64386293484404	5.38609006944795	11.2823820091202
											5.25453977685400	9.98174207981742	4.44451350690942	14.5983583494605
											5.65967878534664	6.76127841789303	5.37249161000471	11.6552720919627
											7.19076416692445	7.91917156691429	7.57818710082268	13.2058591055454
											7.18299444044242	10.4026929685654	4.66885585018890	11.8382479353585
											4.45709868730669	7.75614589785577	4.62233919455729	9.29649697511406
											4.82394328846299	8.69412966815647	6.87314530801496	12.0992208049199
											8.71844668549138	11.8339282615806	2.45402869089573	14.4211781913056
											7.57267044373557	8.85922907596058	6.41347578413419	11.6012607679196
											6.80999037640855	8.74473590416616	5.79377623452264	14.6247799750032
											5.26007479237150	4.86016062859045	5.56190418049804	12.5607055474169
											5.57372149429166	11.6293325610030	8.09905895026758	9.57132878963727
											3.41239447906632	8.87880391219740	4.72254864930871	11.7128251680358
											4.48825588621650	8.15435121267657	6.19484655012429	10.9131417906687
											7.77431073125940	9.73770856421020	5.38979278947640	7.06381870761186
											7.37244065385161	12.9431831637105	6.98434777613659	13.3726959597655
											6.82127110883017	8.30444905127770	7.13987605540619	13.5258460695948
											9.76920096532042	9.02572516155498	6.64943801085344	11.8117939742080
											4.57589040402922	9.36392657825694	4.40254485222172	9.44037620293286
											7.25207472518974	7.59090672785156	7.85673788711920	11.5605027049682
											6.33084893917332	6.03511585038351	5.48435308569262	11.4962342198637
											4.26345710462844	9.29363047140234	3.34680863848336	9.96514030399070
											8.42179779832927	11.3442790721783	6.60591436212367	14.0488401345777
											5.71704979464256	7.09319358426488	8.06856796468035	9.86865154612171
											6.39818659251441	7.19231426647788	9.44085530884034	11.6267761596858
											7.34342065571816	6.60716202216578	4.52178682040938	12.1276086330911
											7.63900785319708	9.94365999585098	7.25283493972034	11.9646617722718
											3.77772920420149	8.65405340316755	6.25980312460338	9.56535428153039
											4.56207415714674	9.70739486850374	8.49108174547857	9.07946240902640
											4.80395542916546	6.97196217737885	4.71210422517187	9.52776334568036
											4.81296049115301	8.87732902159594	6.86541847108917	7.63445733393986
											7.86255946838553	7.03688040413899	9.00094588819608	16.7153491396526
											8.46322048607766	6.69956643857096	6.03286327250984	11.3701104290009
											5.37088401115627	6.28653142890827	6.43031155297680	12.9974845755442
											5.96171281764352	10.5345388484559	4.24635761412057	11.8507127479557
											5.14777524414189	7.83003712782076	5.96824266483865	10.1113624178458
											8.34862950753525	9.31260392447825	8.16312355562345	9.99811737131839
											8.70031868987189	10.1196146904200	6.54984175114892	14.8346179835015
											7.53523718997068	9.61874917132368	5.44797394710994	11.2231768371781
											5.90549481843621	8.91479600087967	8.35250419071318	11.6263775943808
											5.36994418941840	8.08120069659860	6.18388982290647	12.8068197331970
											5.85449589675908	11.1085237754509	8.13995658948532	14.8721854571387
											5.45107944958612	7.65045266730652	7.54749408393217	10.8414294657275
											3.67112915293453	3.19463868102694	5.06473130989700	11.5161159985720
											5.89012657208849	9.90764638380386	4.73497075941863	9.30171701480504
											8.09204353872853	7.94959097168507	8.02021943224554	14.1317688858864
											5.87362402974704	11.7406870120150	6.18185314181199	13.9137036249470
											3.79116699139237	9.65460886629980	7.47302714563618	13.5242077375309
											8.30210444815557	5.50654368692913	4.88528616726083	8.11994488371354
											8.78273628834599	12.6140443126193	3.84697650783905	15.8683235623093
											5.64465864070562	5.61656827440938	4.39787588055880	10.6751663181677
											3.33098931493190	7.40368078907754	4.75895251566540	14.3591908429162
											5.76048101153242	7.58153889812260	5.11680178508728	12.3347077814870
											4.41423068432356	9.34932813255646	4.10187568103198	16.4086803341586
											6.57427619432930	5.31960480126206	4.88866795377908	8.56181377467104
											5.41932225771189	8.55116250375419	7.13125204380561	11.5795770870974
											4.94146836162775	10.2027822543199	6.66325697766533	10.9137866987188
											6.25969680661773	9.58749063529882	7.59626679608137	12.3065701470185
											5.42547686058692	6.92655413811409	4.64586164638211	11.1022375447879
											4.99478200158219	6.84817396361767	7.17249461586040	10.0084984191286
											7.73893680383385	9.46168439815097	6.74652204934398	13.1511774907960
											9.15844871898716	5.29124054990817	7.38343965250814	11.3337290491112
											6.71746871640326	11.5369065799905	11.1054181720652	14.9275897073408
											5.62362598311828	9.41897900649801	6.71113360848446	13.3556702188376
											5.57617769643292	7.32226649210860	7.68726186972082	9.54669498295325
											5.99348127850989	7.85844571875938	5.76803240349680	12.4149911571925
											6.14106665114690	5.55832425637527	5.79522344759190	8.76391616103831
											5.20281310761239	10.9406008806355	8.69859705423433	12.0025426867183
											7.08421508218216	7.31101237412434	7.50216232430388	10.7962928771557
											7.75256917969849	9.04560344596922	5.82031101526877	12.2324863304862
											3.85103883627530	7.41800052259164	3.55462739659663	10.2572786996454
											6.67536970002925	8.19563435674939	6.72924914697228	14.4751005704079
											6.86883962455300	4.73453066844781	5.75843047629945	11.0871032631872
											7.21898234173805	6.84894708527272	5.89862133744768	13.2857182251461
											5.01077454741138	8.35689637422369	4.13650380665429	10.5418246336334
											6.12870702226153	6.14080529713555	6.94344853203057	6.74755650466955
											7.91501485653272	8.43597639267551	6.49390944309751	14.5992877354046
											5.45040886206594	9.60860166032746	8.58670602436187	16.3597269798717
											3.33248071474035	6.89477918316150	3.47584666019372	11.6193149891930
											7.26865951830421	4.18870894174523	8.32352250838330	12.2625396871276
											7.12552373303471	7.38371337649667	6.69088915341209	10.1465569225456
											6.73082852322363	7.25152196661788	9.14339767464698	8.63540447199030
											3.70120317258570	8.63506638540798	3.03275251269883	14.1052377257882
											6.61416327541147	6.32777349237986	7.55960357720093	12.8098952663486
											5.76735193947338	10.2330253458213	6.43074398625932	15.7113965470084
											7.82910189523555	10.1529416947624	9.77603462253106	8.71393603024743
											1.98411208053138	8.09383950527394	6.10017488162690	13.4819624627989
											4.47949884288243	8.77696621965092	5.24247439700517	11.7508195922879
											5.52185337004656	10.4851280978227	4.71296612564591	10.1137200209653
											4.03829997655386	3.02937841020480	6.17461610550577	11.5445403224134
											8.30332430094827	9.96195216441106	4.04267708540866	15.5255690908504
											6.79338158700000	7.37018555824253	6.97685428721862	12.4686584125937
											4.86620033781222	7.50431328513605	4.68608447568862	7.78376973938237
											5.28792553457536	7.28093838337063	5.52898555605932	14.2945772561275
											7.18539327829851	9.53112559879450	6.39389464397122	14.6790784826750
											4.14145113567319	10.5414862251928	7.09750504165192	10.3962931666261
											4.33871761632817	6.02154230487458	6.15195342226483	11.8029806362488
											4.28448299400204	10.9767106092041	3.47481487302313	14.5530771227272
											5.09487905110604	3.29279666504002	6.54557734704359	8.47998798994373
											7.63620250331561	11.3895122432882	6.60417153156180	14.2703844231506
											5.31888624341003	9.10803184488864	8.84836750531676	12.8779051764858
											4.00822768259460	9.41024251613759	4.71803216077062	11.6355940156856
											4.36782763371498	7.54976215068824	5.86444891081520	12.6187546975532
											8.16994424278692	8.37668420331726	7.53359153136349	12.5606845457271
											6.98263247390423	6.27541043981063	6.36714913702593	12.1008724096306
											8.63856825004183	9.30687121313430	9.48723510613935	12.5922581449057
											4.60977479117372	9.22530302913532	8.86707075409910	9.09888557810075
											7.35332700380929	9.49451180721492	6.69710314949976	14.1638303428940
											5.58741295469898	7.79015602455525	4.03187289785345	13.3447979141563
											5.03428896297121	8.16325237389355	5.47909037207950	10.9242735811140
											5.04272532547138	10.5592110546228	4.59208867380309	12.2372022675441
											6.01850252128433	4.08288489123940	7.34146485732376	14.0359876336452
											5.99465230837170	8.74214539390598	7.47103349179527	11.3678887815652
											7.22790973965550	9.55009872115845	6.98330369164504	14.3230939103697
											4.76941636614214	9.78574793063346	5.20968061481913	11.3983758383929
											7.33421717522954	8.02521286209218	9.59966869256687	13.9157006982863
											6.16553780095009	9.97475672985056	5.78122371034684	10.7603163492602
											6.45637493345342	10.4495858050729	7.83982926246192	11.0882554957040
											8.47305399571248	7.72483366988594	5.74045080561319	10.7550217447488
											5.50387590526881	7.69572801346230	6.85412878148838	8.63310638467338
											6.39775612706643	7.18402041754567	4.67590830916466	11.2543875305873
											6.18281957555016	11.9970706823155	5.31238596026233	15.9848656327350
											6.36198878850639	5.47250694994477	6.41487046833473	12.5599278450299
											6.08970355432484	8.46239861922787	8.00299765065461	12.2231965703084
											4.76335853701972	2.24667902315219	7.89184723804688	10.7863683625945
											7.66515644177335	8.52902584886450	7.56841163569788	15.8158102259279
											7.92965848731888	6.96191357863865	8.04912046086991	13.0659871977903
											6.28155917790282	5.84562007994942	7.65672684731776	16.0111806550835
											6.47546903302637	8.49620107452294	8.48749221824142	10.0661351785105
											5.94964061541579	4.27539374272768	6.32854648379624	13.7925792838099
											6.43816603993036	5.64716510083275	6.29337221270498	11.2953544333078
											6.12370253296996	9.55121853265155	7.57396508470316	13.3600544598501
											8.72633739956908	3.41348198658170	10.3746173017154	16.2397513824088
											7.28180341386179	8.66428096165339	5.80180650513813	11.8302978698169
											6.47948743373551	11.7425557794853	5.98542854430485	15.3307193920671
											7.96798835757007	6.83653672096440	7.60448916048285	14.3552288848856
											8.57948076567844	10.7499945153204	10.9329502235547	11.4666664319141
											5.66131717387534	4.69908183552797	9.40550748104284	12.2080311929519
											7.35474459005125	6.74014159261700	3.65189532011153	9.68033877396254
											5.54788411501657	8.71536558894199	7.32459757649520	12.2489922652900
											6.71493019085648	6.41136126899612	6.16202098166787	12.3279773181141
											4.80143669659946	9.31987621035242	6.77407577189750	14.3833743818287
											1.84843612753554	8.61232565986325	4.10871321832652	12.4188061778767
											5.60165488753405	11.8886158305768	8.30340171990057	13.9531989005625
											5.85633755700275	6.01444101160695	6.53774688008307	11.1852033917522
											5.79211520598419	7.63391807377441	9.04305285346806	12.5832275477572
											5.70874947639086	5.60979085144912	5.11058589985428	8.81356659947067
											7.28844224953151	7.31753804990016	4.04484208114618	13.1515712177301
											3.15877056049722	9.00642588882978	4.77282931392151	12.1710277378799
											8.21679408315181	11.2049170546110	7.48599539400071	15.7164154249286
											6.76785897090971	8.27184774753629	5.80791438615185	16.6340141052159
											5.41640517264448	5.22097179414939	8.67228586873860	10.6222717108279
											7.02124077854040	13.2341085971990	10.1447554962302	16.0591356846507
											9.09017112748029	6.30367934731092	7.57761838132013	12.2777112546922
											9.44024106927246	5.94511550530639	6.59621039297035	15.0469633435466
											7.46114642179058	8.71114378085222	4.46927486130963	12.1258001198373
											5.65373186749044	10.5853156161079	6.50021541471551	11.6663576827258
											5.92759646243875	3.88678958054759	5.99725694219869	11.2203414443587
											2.12452834617310	5.51787215095588	5.17281175562454	9.95120338055471
											7.78564657473645	7.41678967075631	9.70798084020233	12.8858432877830
											8.10694059287489	10.8332722838510	8.71494192042372	14.2601391982633
											4.40028831909438	7.31860792265660	5.43994777848980	9.53928746990522
											3.83837539304052	6.80219158764518	6.50266263953379	11.3129340922637
											4.00795192404981	8.47631740459578	5.57368561916046	11.2809510551733
											5.82148156431849	8.37392749036172	6.33984247780873	13.9928587356166
											5.76257744741503	10.1348774367364	8.08064528660201	13.5045940645482
											7.78692744781518	9.61611530168141	9.81466615474029	12.1896638612171
											5.71869441371245	8.29863479528722	8.27604454375862	9.31221627227168
											6.80445259946372	8.08087856943085	4.73610151003159	10.4393541610084
											5.51039702821847	8.53962451540562	7.19851790830567	9.76238827034684
											7.25603640038469	8.37013328297632	5.99247240850504	13.0140370570665
											3.96952060253417	7.76790468983216	6.25817048504795	11.8637075707783
											6.25397444009426	13.8387766274684	6.45549546688868	16.1541705525068
											7.24431562957580	7.91265111000841	6.66471576096890	10.9502810419761
											5.22840400126793	8.18821873689442	7.03855366199303	10.3361967346388
											4.91273719707839	7.40454939366589	7.71226936898420	13.5392477760021
											6.82594957982190	7.66316895467195	8.61339591449496	15.5729608176259
											7.48516212275058	10.8890913222594	10.8870568994341	15.1343970720883
											4.41236252111652	9.47115174967634	5.11638310184599	12.3814738148063
											4.91216849511627	8.47826793300203	3.65997838829905	10.7582274109295
											3.81855939446461	10.6943249511079	4.09842628984914	13.0249738953900
											5.05228800308236	8.95765283199334	7.08362748820658	11.5692562589835
											8.66596208840234	4.81435019380740	5.70441015589101	12.6604675187520
											5.68345252854033	6.69551991222301	4.98145962775589	13.9071900378318
											4.59313482864579	8.38293448877732	7.80605363050310	12.2583041811876
											4.83240760958978	9.21436688834198	4.05250755752493	11.0965702595959
											6.71120085662061	11.1463500336642	6.55411804781056	11.6418966795362
											5.45848110376437	12.1840877726752	2.85551032425540	13.8233651385494
											8.31661177634258	6.80066225278612	5.84343928630988	12.1337571645169
											9.21776725286692	7.28857710013276	6.49808268812594	13.9595774764769
											7.47539380817315	9.47489479623585	6.41038602330060	13.5169227602636
											4.89957172707554	6.81118080835083	6.38825685261942	11.5710880694747
											4.45908055174403	11.7668040356602	3.48700639339011	15.8269578551418
											4.25759549942644	7.79634184562172	6.42198218586908	12.6842694002204
											7.37670658194423	7.77007315733920	7.26378855145858	14.6447491593824
											7.18607447138681	10.4322025002794	7.74495247950369	12.8778241839289
											4.60835850477141	8.26607656210235	6.58981711927506	15.7608164963259
											6.38372165941028	9.21530520372143	5.34318952404562	12.9961112608192
											6.33514385961043	8.48878829493079	7.85346064611411	13.5869508858554
											5.48947292020906	5.14275794751107	5.33262988276965	9.35276766300835
											5.84863600713711	4.97402758808257	6.86755205515201	10.7876718801744
											5.54961635010005	9.46053063711919	5.86190030149435	11.2961094998232
											4.04414434137724	5.22752076738887	2.71518746505486	10.9545426615174
											8.35489902630071	9.16658613405890	5.52374997827447	11.9958964948903
											5.15484964822140	5.13979867994830	8.09704183561049	5.81509544340170
											5.13130056338423	7.37092293368342	10.4457469000610	12.6585662108425
											5.67916942392304	7.96298780397990	2.81543955135453	11.2289848408876
											8.33499120701174	6.32461298698372	6.05259477972841	12.6224422875579
											6.91918048845005	7.07078399649233	9.20740474069729	12.1921910935537
											5.80869766431494	8.26798952690409	6.05565246004034	12.2083891226115
											4.72328280597627	12.2909089632738	9.01856832142873	14.1456931845690
											3.38711884467821	12.1728190587379	9.82527276059202	14.0762073430970
											6.16559080967835	9.85659633710323	8.32695766895899	10.5931057093866
											5.34493582157474	8.37522915830440	5.11740318965944	13.2173425274044
											5.94635375774686	8.27183445479374	6.16606694950134	14.9743256064270
											6.55367201947789	8.05617361888019	7.33370660386060	8.58228062411139
											4.40326356116328	6.31102743810721	2.46694145221218	10.0524438506968
											6.76816562126079	11.0683083996508	5.93388855116582	11.9292179579814
											7.86404749298077	8.20299229346317	6.47388805052193	12.4023979426436
											5.30554404996783	6.87538516454290	6.80607011982484	15.3748237426932
											5.42435993383645	5.83130382133686	6.77010079683911	12.5339531876450
											6.92685441198399	5.97892788556446	5.37634138294190	9.99708273235532
											7.16473162558256	7.36749860922536	5.61475517800108	11.2540732104379
											3.39228494934963	6.96556502954205	6.04970409532929	12.2150124061863
											5.13988233920552	5.56755447829689	5.45402485858966	9.77096077914660
											6.79812961171263	6.76336560116837	4.99605088242668	14.6879835685941
											5.32580719336679	9.05630333251103	6.94390618185953	10.9862985860680
											5.27337437444409	10.5050214105914	6.51983966438073	14.3967853774637
											8.55888434219156	7.48435929506432	9.23273058566047	9.13418165688770
											9.07722916653480	7.81495723271467	7.90100367361693	10.4373791096182
											2.62970536612802	6.01382126821503	3.61358116192336	13.0522754770407
											8.01238791024691	7.80096786535522	7.14711943522540	13.4635150152007
											6.01825509945734	7.51372574233384	5.60251319167495	10.4084188124606
											6.35335489216283	5.26173677975665	4.41993832195518	10.3651280746400
											8.90684977429829	6.31054579689272	9.18007203477140	10.7894410835560
											9.37207974636637	7.34428506521321	7.15170175533714	12.1330680091048
											3.47864736232323	10.3866905246865	7.57117832052989	12.2603444647273
											2.93850370575608	9.80540213124202	7.50941510609036	12.2753995671668
											5.19941849098430	7.61819736363554	7.89957982829950	14.5312279216964
											5.96914926579651	8.84854689632640	7.82681049968485	11.6739805514720
											4.47129321781302	8.82131017829351	6.77078086116168	14.6995501745160
											6.37623701204943	10.0063153348230	7.12264846813397	10.4215001406805
											4.47597297509485	4.89237097146966	4.64890058533264	13.0552728089154
											7.60728412233433	10.6185850415857	6.25562530819482	12.9336965751440
											8.67220309964216	8.57626888285189	7.88562627416288	11.8112796982991
											5.43645168195296	7.76908180468928	9.77454046386125	10.6276228687916
											6.59505532054718	7.93900905285169	5.52996217785770	13.5132756333088
											5.93863280367788	8.25613832046676	8.33816507012294	13.4416994057241
											5.79250719381478	8.56568017870665	9.25144373947520	14.3828300380961
											5.12117064914784	8.07048768325632	5.51732920457456	11.6039073639510
											3.69926785151452	7.85010786925515	6.14291306635041	12.9583116558280
											6.39199880138198	7.43674836977565	6.98790415099555	11.5041212220445
											2.48247320057684	7.58696442491550	5.80859031560274	14.7026079935864
											7.70294994534338	9.82951280785086	8.98457339309949	6.56760547792247
											6.24039853811848	10.1421219528660	5.04605264025081	10.4793294328467
											6.25052082190738	9.47553477680397	6.77992674173860	11.1179816928441
											4.58592538533571	5.30842471434712	5.89345931760915	10.5542586862485
											4.72638242062007	6.17176914825110	6.30379384304390	13.2113547388349
											6.92987878167271	5.91033760930488	3.58096596371803	7.78766696865426
											7.25259766943961	6.15022720359693	6.78299514945729	9.17146106025115
											4.91683502606301	9.33336080566225	7.61978950723587	13.1260473582283
											6.41318345398014	8.61934152854814	8.22475101044768	13.5614252673865
											5.03791733386454	5.38165437790911	7.57416945320650	15.0387007604287
											3.55707472945738	8.76734134936559	5.76539664532907	9.56269856846957
											5.97503252718267	6.38705130021184	6.87685332228661	12.8153158164835
											6.36316332109738	9.34274839446686	7.35496701839369	13.6787766775992
											5.48343987042546	5.60629951350863	5.89541612951720	14.4233401749179
											7.62456396255730	6.67013426075337	9.15265144538625	11.2341371151451
											4.83604620441587	8.20545415380824	5.84765391911898	7.37275035980250
											7.70759297493728	6.44655853896855	6.39933471934538	8.27514507486470
											7.03009929877482	8.94558503412004	4.71594951407277	15.0759529127527
											6.62153785476417	10.4770528150229	7.70424777653503	14.4400616172717
											8.13697106627015	11.0976464786122	8.24393440364975	15.4182186727242
											4.52056060071538	9.35759404796073	6.55317790557304	14.2215486748525
											4.56280094032838	7.21392148070938	8.29236850409271	15.1790730020218
											6.59140956269293	6.91449853453685	9.15890635987934	15.8545041127347
											5.64392038565424	6.10813839678381	5.36542318781437	10.9034622834179
											7.49955923135698	4.62024266872619	5.35988998629039	11.2600901288749
											2.01234108933265	8.29873467106544	5.87728864511056	11.8160071413845
											4.09836003905896	9.60793695764578	7.06035170413722	14.1052091182072
											5.23092752765302	4.86754356099828	5.90588180337400	11.6568301255747
											6.51744704175635	6.06580329533352	7.64692659092224	9.90006049645246
											7.24168258389581	9.03077508629199	8.03602471874140	14.3032591643968
											5.00654693479640	6.23509057560358	6.62209447535225	13.2534306870247
											2.52942226153816	7.97215282037019	8.97719068038974	11.7189954868755
											3.79870978561417	8.59628464092765	4.95427812584777	15.1217004147144
											6.22074777055156	11.2418703397663	8.47820438259203	17.1060854307759
											4.14088271929305	6.81908012858906	7.43257129079873	8.17578562755920
											4.46584948761117	7.61732476290438	7.47984255145352	15.9225267874897
											4.91805279515208	12.1253755752841	3.54820322920841	13.4093378580652
											6.40521591746368	7.51822128902489	6.67228027781694	10.2819109781905
											5.57161557682829	8.16182262439413	3.72418307798385	9.90504669614035
											5.80102727766201	11.4576361711326	4.53629288899592	16.2611977991135
											4.61570950796038	6.35210642536818	6.12567204683746	15.9813439287547
											8.27403745647726	8.49622095724483	9.20987249956320	11.8037284852555
											7.42684242932480	8.52265548839801	7.17906019996245	9.45949942528308
											4.10218468606616	9.01820402605143	5.79971622082171	13.3972400815373
											7.25218923091986	7.81061451839151	8.38458238395065	12.8598903575226
											4.57451888191030	8.82607909496029	8.16584427023493	12.0014422865878
											6.02965325349974	5.71457124938158	7.45996965024120	9.64810681680570
											5.49884205839903	10.0798140783399	8.00118748685138	11.5183905811338
											7.14137687752415	9.38583655504859	5.87725253885673	14.3219751664669
											6.62278469430473	11.0546334551501	4.76823394804340	9.49487830310980
											7.26403778986732	7.80279625563454	9.28136811025167	13.6026230312216
											6.20361896625789	7.37749735249062	7.35642915806271	13.8732174627527
											3.78018824261199	10.9843466020769	5.00816148277528	14.1167256044309
											5.05390938803415	5.95983801740419	6.75620058672193	13.6791878150530
											5.41006808638646	7.06734295524332	5.82593982212166	10.4099808419608
											8.28870418205412	9.62301569067734	5.82859272804194	12.4506756199386
											7.69863505956467	9.17034764342779	6.94675142187348	9.64376464418109
											4.72859809136818	7.96125273787987	4.44217993719238	14.2174765635911
											5.77517140153662	6.04146579591921	5.30879984486871	8.36252483976718
											6.72248627890270	9.56546547599382	3.48019597785175	10.5974896287785
											5.50195438165325	9.04789831280143	4.62416157163142	14.0856719102181
											2.66293118725317	9.93290139485880	5.99984337871180	16.0232495176356
											5.16386792809594	9.26041242797862	5.94982935339791	11.9459433646666
											9.25008806938453	9.31651729494820	6.90984918321902	12.0289856824685
											5.08949791349325	5.99923714732087	6.44953694511987	10.4167826065547
											3.23179904442028	5.88884538906378	4.20480913617243	13.6571075845983
											6.33872450643888	7.04516923859102	4.69024086451016	12.0438406221035
											7.79347322490164	7.39371271772362	8.83869444417159	13.3969112675983
											8.69555187119300	9.81988696481741	8.85668510223898	12.2769809072348
											4.93887006600126	2.39979631502962	6.13939719686028	10.9017998358339
											5.43334383468884	5.69613947666266	8.56817323427591	12.7367342511256
											5.07249934870883	7.80431127565532	7.47685994723124	11.1594391072712
											6.83699720850498	8.06952703528152	7.14941471984384	9.04524702485380
											1.59351401635483	6.68842109471567	2.98065056775159	12.2086447360772
											7.80211185411428	9.77266340491973	9.62631633707705	9.53726860268760
											8.26988052556590	10.8624122565773	6.46819867138527	15.4240324679194
											6.84541911444050	11.7980898725566	7.88595587992978	13.8207247263817
											6.87104403100222	6.98795937772560	4.36214604824616	10.6076674314885
											9.63341829067485	9.20998811017977	6.58216000503999	11.7198634056198
											5.88176045995327	6.01408427021439	8.57567272136480	12.0881631453084
											6.54870873828904	6.03277881878192	3.79364782314799	9.32734424992374
											6.16902454564054	8.78866432854704	8.43275076067386	14.3938330410905
											6.95595762058210	5.50536075726085	6.07961482349872	10.2390730425788
											6.05001604186565	5.91440627280439	4.89465906388311	12.7967913097153
											5.75147988833612	9.91137280829084	6.30127414523979	11.3113577696273
											7.50078477874543	7.81439554180272	7.99396607358099	13.3779748520335
											9.06283511915832	9.69403868895638	8.88043946758033	14.4453856466617
											10.1467929827843	9.11300540568139	9.02009874092316	13.9362276918654
											6.20462811781331	9.03360681237311	7.24044949739773	13.7983890571098
											5.04066422123830	8.60736710728964	6.98978873284829	9.86370693686140
											3.15492549987053	11.2445621835364	5.75422274469452	13.9179705600781
											8.97565687685808	10.7686626019556	6.59310949345045	12.4134968302872
											4.96935372653831	7.81119229010905	4.71082072498369	13.2835462825667
											4.89923867736782	7.10037642816050	5.82171281892040	10.8108697533078
											6.02998678920041	4.24629949922849	6.80894686547175	11.7635336698281
											8.79520850305022	6.80143424832571	8.71757154801346	10.9750207763391
											7.45506365221092	6.74810441627756	7.00788995848217	15.1521413730992
											4.88581921708566	5.53700297662062	3.30333019376791	8.91160670095563
											7.23064888224447	10.4843061782138	7.43603064150934	15.7722392657480
											6.18666314907237	8.85140687918159	6.04510431252929	13.9467803216473
											4.14184320642703	6.07332277730078	6.05042057516494	15.2551338621204
											7.98772964833587	7.67234405497405	3.41536292101271	14.2755876030001
											7.43601358280847	4.80908891992839	7.39686846297793	12.7109543441897
											4.72710086726538	4.26855433416372	8.98552171601914	7.46013223550030
											9.56319408262324	10.0015275342334	4.00460624488358	11.2086720711264
											8.07459424012568	6.72236673527773	5.07647546907711	13.1317665772043
											6.70263556654264	10.3438412853770	7.98034316344625	14.3149834221878
											6.43699209444080	8.17173264878898	7.09910772201342	15.7889364461630
											6.59160659448474	7.88334887272562	4.62402646716538	11.8715753580593
											5.15325893653313	10.3603466009325	5.63095579832372	13.3343669160799
											7.08623335967298	3.65065643338641	6.89290154159801	10.3414223825823
											5.69285127656485	9.23435296960090	9.30836026494800	9.92761558505266
											7.16817809482459	11.4993533048844	5.76241460238375	11.0520964865163
											7.65563604404384	2.37919509468773	7.65879196269547	9.07873649414239
											5.27702978369197	11.0283069745016	7.04810578368182	14.8102117901040
											8.41236616105205	10.8440001722128	6.09976048464349	12.7381913861678
											5.52247731348577	7.92848994137274	3.97662130762740	11.2937598619133
											3.26026566383313	9.20210302994327	5.41482607801464	11.3662449403777
											5.33588411797394	9.39477380121470	6.71641089658697	15.2070161608314
											8.02863312657339	8.17285777725101	6.26760315475999	10.7250721833282
											6.18748820649858	7.53789743139710	6.65278501100282	15.7550326961092
											7.26267002132551	7.56953334532845	8.27404694365173	10.9330554351759
											10.5531043322211	5.86331677295121	8.58118903030065	11.5614107328987
											5.91754058467281	11.2828844208122	8.79284706758229	15.0093503592568
											4.38072716557106	5.30071798197729	6.09345082606456	6.68818957778174
											3.81497117766594	8.11198013900529	6.11914800757783	15.2462556465162
											7.11416987975080	6.21822504347988	6.76467237206898	9.81137688123226
											2.42889320809747	7.74707822117484	6.68887485459712	13.1952180243057
											4.57420445716441	13.8142077696132	5.84216813483831	10.4872970792130
											5.66846879965924	11.0514606266184	5.97779168459347	14.7816644886422
											8.06432644595605	8.96245481667388	6.59159226765339	15.8647878798609
											7.68860638842689	10.4886511277343	9.55998226278873	12.0029651511175
											6.52217826417477	8.27231058931419	7.78941345148071	12.0575551423837
											-0.537331754830316	9.58429164350814	2.93351192559826	11.4065231293586
											7.88413912057602	5.10193287032868	6.12621270987709	11.3096578553429
											4.27778287590414	4.94861834277639	3.64047194184364	12.5271966595865
											4.16544623578559	6.64805863724059	6.74572055466060	13.2231405522294
											5.81894464165655	6.87618350574430	4.93874698965718	9.53054055613497
											7.46679696002789	7.84474241569633	8.64711039609908	12.6893401926054
											5.63022776007704	6.08750265324639	6.34230955847210	12.4475738895435
											6.55466964775785	7.55272287371746	6.58330807689666	12.3290421815753
											6.52852691920622	10.7484753587385	8.50172551406303	15.7688560012341
											6.18843112745340	7.48552426097425	6.51007735637380	11.4014434998630
											2.87462048356528	8.51947332924306	6.44073731240165	13.5445596716478
											7.03620757848204	9.60477072315909	5.91416283188075	9.20825507715971
											7.91014707695761	10.4847845699091	9.77672012322447	9.49356338784342
											5.39941222581795	7.50045337345637	4.52731863829715	10.7139847842286
											5.23090464288314	8.05904150718444	5.73079320743002	14.1734126756924
											4.64832335895020	6.65016645213628	5.72706555935931	12.7589672671422
											6.38127654559085	10.3094418479901	5.43698452522631	12.5135001633901
											8.68264278833123	5.59398640502029	7.82977020496404	13.1316074934702
											8.06553931368258	6.15269545123587	5.48012953699169	8.02899423116000
											6.74117386667682	8.26549295034667	6.08259228666798	10.7045638291861
											2.72800134758532	9.54561259885625	7.42710868126982	10.6962455439434
											6.69859319957888	6.77851674056194	4.50791635354405	12.4917106556906
											7.04966858355080	6.97723774876714	5.36906934513463	15.1888868878611
											5.26440655104254	6.81466103306336	5.72565358370850	9.91157969868887
											4.87925130949623	12.3158371513677	4.65296773481487	11.4518396008859
											8.98377584016606	7.91137118503599	7.22918615700298	13.0980684552887
											3.94801950304715	6.77270637519867	6.17041933386340	10.2768209316255
											3.26862734491327	8.12123455136400	7.33792873930217	11.3775129704484
											5.48124209033289	10.6330193600740	7.49357208124656	14.9145506579778
											5.80130288527296	7.12765312851830	9.21477985937367	9.90213367453226
											6.12899667527669	9.03128359380099	7.56937663866761	6.63200317564170
											4.58691532611009	10.7625808023989	7.42834597025790	12.6077156536598
											4.76965004622736	9.29071039943396	6.33485681689276	14.2706526851336
											5.70788821026221	8.26120314689043	6.57589917005391	17.3387389912208
											5.79651899768121	9.94391449112734	6.87038925653193	10.1449532682378
											8.23455137969931	4.16391964354804	5.67413016657348	11.5248363527772
											6.58427651904805	6.38535208315022	6.33194727868606	12.9715500668845
											5.63046826578980	7.14305506010593	4.74129415983839	12.1492256723255
											3.95851927420712	7.71040529523676	9.20608610099545	16.0183008632135
											7.98227527625712	8.62761791410198	7.30399459581099	12.8813734310105
											7.93366741016698	9.43390008913892	3.21967634881202	13.7124877747210
											5.84808450202019	9.55641112449971	8.09811367929704	12.9603295358421
											4.25913952522305	8.67189549156789	6.30872985983793	15.7945932557936
											6.63145507699118	6.17712002630456	6.93405648595592	11.7590512462175
											5.25375759042496	6.33486895799529	7.21681064762519	12.7711204751450
											6.38070978182363	7.62328099594398	6.59771473948351	12.9487805310410
											6.16115383430643	10.1858342709510	7.97910224537279	11.8905409017747
											7.77661735296317	4.86645948922589	4.98142601692863	11.5383260302715
											9.01127551297306	6.44506641368055	4.92334767485483	11.2114147017369
											7.51892022806642	8.43321039559325	5.58380347807895	13.2226590729711
											4.49844981025578	11.2110269564103	7.41513846223529	15.3947925466838
											4.64064458651322	7.97874675212211	5.28721479140759	12.2616895714909
											5.16188455810455	5.35905709215794	6.96630300371851	11.8472904490273
											6.87266784708459	6.62183838501676	7.51582322531532	12.4593580598718
											5.26985771723128	10.9843881088963	6.47938351242632	12.0327414126089
											4.86537504066557	9.55185037310670	4.90379967575095	12.8938915001428
											5.67319649858532	8.01764136555295	4.17457100517462	12.7582065794242
											8.18946517446716	7.16059280201436	7.55109785539670	14.9137886878737
											5.35360974777523	7.96921329860512	6.08943762392319	13.4304833635135
											5.78214735576744	8.43412542006684	8.32495346454607	12.0410135123251
											7.27249314491162	8.51249177337527	8.35316319825444	9.99269848263049
											5.75801091551665	9.36712264265138	6.57166864678849	12.5227063444154
											5.42889173810703	7.67662161899836	5.25174522168109	11.2057543448411
											9.96362906243310	6.80946048668639	6.41223304429154	12.5796557868038
											6.21664763266154	9.45342432728296	7.16317069504020	13.6941450503229
											5.99992427981746	9.24090051309821	6.52748797273305	13.3555385660001
											5.13726255559647	10.4060264811344	8.12273350263494	14.1879641275437
											4.13669269337899	9.46740591451085	5.73097361740750	9.97685724215713
											7.54061169984384	7.88641410825085	6.80492504840835	10.2790937897714
											6.56638394904645	9.75029460833633	4.06293480354001	11.3845595443416
											7.63527935583831	7.93707540993075	6.88899411228305	12.4460917107582
											7.33106022526994	8.25960569573248	8.17333027444432	9.27322470956917
											6.62016325604342	9.40695229770820	5.33452051019278	10.9907737378471
											5.73748252362430	8.24717698083863	9.74015888319820	7.99514177896636
											5.35266380037014	9.27288435928604	6.93260271305543	14.1595894418823
											9.34906733134824	9.33176525834451	7.37257606409227	15.0287545705080
											5.57824092626569	8.07809533220570	6.11121923551110	12.1036843149031
											6.09580676870096	9.14793204805723	6.95087548652585	13.3571805566226
											6.91127674471629	5.81403570038990	3.61504089318581	12.4263386536771
											5.37549649784447	10.9419243140418	6.94254979368774	12.7182372898965
											6.56830681113449	8.51259096694444	4.99443854184262	12.7065420226705
											7.06012937206066	8.01718895166626	6.87780611285992	13.0805761612536
											4.71444669262928	11.0023583444808	8.49061504279809	12.7021235150711
											5.91387673681829	10.9171102847564	9.27037804860563	14.5486895045296
											5.51740739283154	7.29937069713771	6.10573211701063	11.7258824143852
											5.84852229721268	11.3316948911600	9.06871762309563	12.4498048757072
											2.42435978679621	10.5340390098003	4.02862285164921	10.8487044001558
											6.34920516799279	5.45886392896740	8.23217888140853	9.92929183568543
											6.22093618692304	7.32755242247739	6.11153900718655	11.0607097431995
											7.14889487857155	7.06893172441834	3.98502424216676	10.0548772799001
											6.44679750666946	7.22284207054735	6.22920155478377	12.5710157688292
											6.22895227750562	8.02618768095022	5.03701192059461	13.9656614422728
											8.35767270112345	5.33782294511396	6.29278266724696	12.4199091078747
											4.57119043621635	6.51036450820450	6.16017470856682	9.21923216898632
											5.40727826066457	10.5904670809087	8.61845056831838	15.6663496564511
											5.44319824770630	12.1897319195176	7.40182131516791	17.5609932457025
											7.29719921771245	7.49079707071672	7.14818841728582	14.0708503420353
											3.56519288839241	8.00965374177573	4.21572007628184	16.2250562429355
											6.67683878225857	9.84599334498732	7.32636953671761	13.2027417348872
											4.67710256039961	11.0414033687099	5.96180502960945	13.3057819546227
											4.52080060978708	10.3761986324042	3.12972456342440	14.4928836276120
											6.10188837551129	8.15367556025634	8.45325784378569	11.4317317031185
											8.47980101596729	7.52100158497698	7.96383340529815	10.4294214242720
											2.01120389986011	9.08831770831226	4.68103246765758	12.1456192232800
											5.54788715302097	10.2061667280465	6.37085024089827	16.6705302356512
											5.00901534857156	6.20170679340132	5.81120616747456	12.2952951886637
											6.17601404915292	9.76557613171519	7.37917565174206	7.25589234689093
											5.92300200026746	5.62559725382119	3.18710384228588	12.2225002023186
											6.70706798550886	11.2115379955519	5.79024893845023	15.0057177854662
											5.16709843765144	10.2125814027830	3.08672285579449	10.7949177456052
											4.48531584776012	9.78983143022326	5.18040862417476	14.7855963547551
											4.93412596204636	9.97141405900504	6.57772809826607	13.0712463935642
											5.08459814405044	10.8210586417638	7.46933230970591	10.7632287149577
											7.65059387849252	10.7238085744598	8.43579271796221	13.2140753287467
											7.76738464468239	5.73961569997242	7.35912701685863	9.75454241578408
											3.21719504707613	5.72616070422600	5.97551687389314	11.7602368248463
											7.28163297622831	7.02985038109368	8.63929392556135	7.95046915067262
											6.92015598718183	6.05719359728484	6.90328028530087	11.1165455280017
											3.63756904083359	8.06054775028026	4.53225588507634	15.8227909135121
											2.51630341323003	8.35865943097331	7.12550640826544	11.1865892495213
											3.64502621197273	9.53021326832353	8.18554248828420	11.9132768193391
											5.74625950780413	11.5198523323581	5.64686593436018	16.2693327167948
											5.91127957617706	4.80238624059594	6.80928724708533	11.9409142760224
											4.28978773621644	8.07518465445526	6.89242434704119	13.8184588814104
											7.61769794186355	9.28574667764100	6.48754160547759	13.2642832443812
											6.74326261221052	10.2757339974684	6.46773201260743	12.7561171233330
											5.43440510099835	6.63831449745410	5.90161523898193	10.3864895075945
											5.44465597939521	7.63546872575732	8.85384339837619	11.5168843931948
											6.00078170004411	11.4846001237012	3.45524875696956	13.5700172052861
											5.56851924613035	7.89076500928205	5.25120401369818	10.6507749287592
											4.96894010838980	13.3388867337503	3.96057756788872	18.8370617433562
											4.50291887941982	7.05940336386351	4.01804296286723	9.41639928140330
											4.86500479016934	8.59343187056947	4.46442606373088	11.8831339126963
											9.36017654210187	8.02836760407678	9.40664024478729	13.7662592516004
											3.76183000472407	8.69481468647821	3.90840769209885	15.9754107245820
											5.56588579904191	9.19994233055817	7.82697926209998	12.6694320353579
											5.07808146663093	6.45191388636956	5.06156025507505	7.86708838658154
											4.91817699743374	6.23179663394856	7.08427194238813	12.0141930013242
											6.83409184450340	9.71995736603558	5.36652777685336	12.5779302749169
											7.79180013214876	8.32617477571766	7.12213636759746	16.7289174937679
											5.36414371267406	5.89082446285963	7.45108730840935	11.2179038144377
											5.83723599250915	8.07565019644131	5.72533616008917	14.0730786832068
											4.77534244439201	7.53203740355458	5.68818486511620	7.30940934107086
											8.04953016964916	8.34096855696522	7.81181763049422	10.9545160124006
											6.39218053374584	1.95882814622485	5.41642637440995	9.69083809007418
											6.42175269660997	7.62272020456920	6.32456071905304	13.5500138721796
											2.73604723018898	7.86692363490682	7.48167353023424	12.2692754817686
											6.67145056536163	8.13098731348451	7.38080688566056	16.6487354330041
											4.43277207328075	6.24807608671108	4.99882501897917	10.8346339530890
											6.27109199600255	10.4510378912188	5.76751297805442	12.6578858549361
											4.96299574091694	10.1146878783482	5.14072925930190	14.2187361569972
											9.58090038302511	7.63731677585685	5.22336060830082	8.44335390968450
											6.78571764591216	10.0698053407020	4.71874122254831	7.48682270144228
											2.92061990215027	6.69694332468574	5.36254197730403	13.3325834683092
											5.82118793606612	8.01238610274545	5.40703168659927	10.9904017165767
											7.92448478482072	10.0281914667484	4.39182354036864	12.1814362202739
											5.89596450055754	7.50702578161925	6.76336893732563	12.4720587423226
											6.66826450467899	6.05776558483847	6.07546112791103	13.9138517431718
											5.86855150820770	7.90875476561229	5.64930141140077	12.1255727726549
											6.75419356518031	7.72725879910482	5.27696327866185	14.2332662154859
											5.93291584414993	9.32463826047016	7.37431263513653	13.9286585981578
											5.44177778689673	7.24595416753535	8.37221415546024	10.4986888610721
											3.40773782710348	9.20809463726087	6.37064047748558	9.26022599861091
											5.73638685975464	4.12102569975610	8.22502019816405	10.0276068888108
											5.25388209756173	9.44862615995121	6.75803487337788	12.4936965291110
											7.60617964240658	7.95192726682183	6.98957803763307	12.4785097516493
											4.77547974859224	4.51365478747188	4.63721733459551	9.26160652267405
											5.25506906137378	9.30846774405783	8.78921802160254	15.9938975882491
											7.70836244854981	11.8474377665321	9.93881963901060	12.2631093642553
											6.39539970214649	6.15458683572533	6.10584041364682	9.50968630198219
											8.96503905797015	8.18942968418020	5.85402974302499	11.6672616635358
											6.91292742954914	10.5105959414507	6.33251701684317	12.5044784400916
											7.85506913987462	7.38275700977986	7.78470663271784	9.75528404664067
											6.58926568711104	7.09591221985001	6.29489545949701	11.9223765403779
											3.93577066391047	6.28501059298228	6.45361437638585	12.0460989538480
											7.61569460426285	6.66101791341150	8.51351679960249	10.9114817140779
											5.93010573539703	5.42265964813534	8.73858234350577	15.0079367770847
											8.54396062258718	9.19030550942687	6.85589238077862	16.6079673534167
											6.93518562203220	7.26581216408492	4.34271464122634	13.0991277790606
											4.91936551186141	9.58029064331403	6.75722957182865	11.9931460113989
											7.70255178515255	9.36519384885832	9.38646426729262	11.4172061697028
											3.82851953204223	9.52587447762115	9.35381565671718	12.8046996870824
											5.09300361417754	11.7414742181356	5.19097634925103	10.8171583777451
											5.18727186421906	7.44414643685301	5.62283200110134	9.43102298393267
											8.53399520615831	6.73002324896167	7.87855138858535	10.6857932506798
											4.84989061238492	10.2974606125775	5.71323116266706	10.4102192947836
											4.13345477097155	8.41054412127646	6.09258732680146	12.0319110232979
											4.90485137679545	9.44509097956785	8.80308270438465	14.6452451792211
											5.71074167440059	7.71822214821241	7.48862149945725	13.9188606430972
											5.17534580550376	5.05225589983577	10.0314457242148	11.3326384003990
											8.36070762766070	3.49074727442963	5.73805761981216	10.2300234754553
											4.80811071494486	8.00298847829829	7.20275561033181	13.8252269909335
											8.23808765267396	9.36358393612926	4.62154054672826	13.1434717919737
											7.99615260896544	8.08946246603393	8.47191253029676	9.99875711029765
											3.72638123227377	8.44813479466424	5.40484641312207	12.7737087885279
											7.41842560925870	8.41567056550869	7.13994775303223	9.95837481158389
											5.33986480125068	10.8073087386284	6.11699844002285	15.1243793662634
											6.09820672562771	11.2514617238353	6.60997284881201	13.9109074419821
											5.87817352493350	10.7382979366161	6.02997245175674	11.8694416943906
											6.67988259199318	8.36741460681868	6.82479950649122	11.7183539012943
											7.98341052147666	7.76022966606687	3.85110721575807	12.8091961111089
											7.63190638756937	7.29976199583655	5.79203276766408	14.2501525575878
											8.13966464897455	7.32442529707869	6.69514632606535	10.6228609604266
											7.21009094590950	6.99439640950165	6.02183422254252	11.0175154625225
											3.90620605669724	6.45509338759390	6.79136911003558	12.6814552253925
											6.50165442035099	11.9114695511757	5.05204375990400	12.4181141205523
											6.74929473473371	5.00259013334891	6.81111699328840	10.7444221324706
											3.79247876217142	8.39514569315245	4.79928855242798	15.0918382465920
											7.19685845658048	9.26324827265923	7.13116485053208	12.3431486556371
											7.29081155247505	5.87034575210320	6.07650470250911	11.9908311396836
											5.62801084183892	10.0012751844046	7.18355089302187	12.3947751200032
											8.18799488542199	9.32377001016143	5.51209100468862	11.8054835228888
											5.15614493227777	6.46651117996989	3.17118983245727	11.2149898844739
											3.34841386053343	4.03481912509744	5.20390930714728	13.6461148405383
											4.97158663037786	8.67052113799843	4.21025349815098	12.8938824665153
											5.80848371775689	6.73305490818808	5.73062234655258	17.3374282046076
											3.05576237308036	7.33514466756700	6.34695205143752	10.3083348155476
											6.95560481457845	7.67605263473434	7.99880407555089	11.1058499419994
											7.00994749807518	8.00757769692056	8.11994439702864	13.4693867739456
											6.48494382421577	7.62298454013582	7.27148030287301	10.3953738931792
											8.61900088855171	10.1372697556013	4.80715688498943	15.7056779956365
											7.51018164570797	7.07086408592417	6.14564971792090	10.0705568961962
											5.93646440752935	8.00985928314375	8.64876149727387	15.5274350249875
											5.77563793942946	10.3225559512280	5.83369988770921	12.4963828942394
											7.33234480596080	8.93901846413570	5.88914950702247	13.1328964143559
											5.65115181953149	8.83069610406189	4.96112043159238	11.7411237278924
											5.68439013694288	9.22115040562148	8.25693945940821	10.8697204811408
											5.81915576259224	7.35796273580709	5.52302693069320	14.2485010350271
											8.73799551553300	7.12164588925105	8.41944406593777	10.2443448315486
											4.95030760485957	6.64287690568779	3.15451708784490	15.9358575698365
											5.09183720688852	7.06869646948615	6.56018657804757	13.0327816214714
											6.60115810563231	8.33276898293672	9.63231930692449	9.92630753130937
											7.83647587857103	7.20140556335047	7.35420075306152	10.4309695541314
											5.69578358364141	8.42124682557551	6.03569278650264	12.1506457962467
											8.11930598909722	12.3416069014443	6.22780165430678	11.8613474537655
											6.00883332984201	6.52256379335282	5.64980303100548	14.0858796155678
											6.23206468231156	9.51368584295414	5.69642801684250	14.8818137060845
											6.08504219875507	11.3457384628763	5.81924884265786	8.82875400679632
											9.78425534820152	10.7259137621790	8.09748089661336	13.4073016603017
											5.53238369293076	8.66497606178349	5.35517281990646	12.5903079669829
											5.18891781111611	8.26489417065141	6.82313626517681	14.8024264846130
											8.29939757449277	9.43217315175333	6.55716435843047	11.8283970917449
											5.25107318276641	6.16838675695052	7.11179673700256	11.2358549660363
											3.94898426755105	6.38098334853082	6.15497016453528	11.0667590159815
											7.10491364158308	6.80751041744858	7.79780171113918	12.7617031201354
											8.25848479343900	11.2806939127227	7.12569254417653	11.5526521129631
											4.44903253459413	5.90185417776427	4.30382808384394	12.0007168239227
											6.52853746963457	5.69172158010329	6.66161576597642	12.1032222264414
											5.50576676895265	5.91882242592914	5.36035291354438	11.5898206709942
											7.90231524115197	7.64678749630852	6.77190057052953	17.4714725937896
											7.85453741272178	9.75024294090795	5.65149848588921	12.1669740506234
											6.51693433524972	4.36656457098046	9.05764843544719	9.57645883663078
											7.71344349947826	10.6203844232201	8.52342517126399	12.9857957706176
											6.43388122608025	4.58805654713989	7.48320012315384	12.3890419332361
											3.08816742326105	8.24022726807973	5.03503625664927	14.6432796120686
											5.02704563857776	6.49554781051653	3.33699903364366	10.9081178835239
											4.89473435535541	7.73569105796972	5.20637390395782	10.7767485604184
											4.31398780235943	5.40433791747009	6.77975125504329	11.3667656422993
											5.59532821871078	10.1513494241073	8.27069052605804	10.6676378245389
											6.51030277338183	10.0952023841103	5.22210379839776	8.35689142115859
											4.55250311917547	9.09972335001010	9.76948380603484	14.9766295534335
											5.52611796174973	8.25325307553223	5.73431087535363	10.8837763412107
											2.13510948490382	7.76363628809143	4.83017162085314	11.7532249273804
											3.47489490839468	7.49446674037986	6.14560663991030	12.6928203344806
											5.78916667130691	7.32499224505183	6.87090300416398	16.0422692041276
											5.08963663599171	7.50526766032081	4.72669566771618	10.7911130690709
											7.12087773898447	7.89156437827043	6.02458236810375	7.50545999910558
											4.43302325340113	4.94074493552750	5.99144398485961	9.97735411930863
											8.53958365679951	7.29992057403876	7.86540766461234	12.5314319482114
											6.63725403823602	8.60627740923261	7.71129551494347	11.3527195921113
											9.41106844608686	5.32215892166458	7.70805585194048	11.6296051214104
											5.42636536193344	6.95675543240553	5.25473488123154	9.72148211762482
											6.22536423287290	2.08221477326023	8.26070996754761	9.99135466255775
											5.95371151416598	9.26158713186977	9.15970385815260	11.0191003352053
											5.19377830054651	12.8213723775840	7.01449146352053	11.4930942455645
											5.17411117992964	7.77651794049441	5.47311330227610	10.8574005899074
											5.22433593221250	12.0238319682697	7.64810763197120	17.8979537223285
											7.69390615464084	9.04216935555328	7.76005124369447	10.1306924391864
											7.76609835496212	9.65318114692297	7.05570188033895	16.6650792225576
											5.18290822653270	6.42813978492303	6.62233556314967	11.6503436081749
											4.60769250669460	10.4785195777873	4.46109271283484	14.6075437554989
											5.25954942552110	7.61276788116699	6.43285782314954	9.92277749016707
											7.96868664886141	7.76644072311662	7.31471765823734	13.4609588557300
											4.83725561499438	9.09492637586823	6.13801271653147	11.4926064514657
											5.63488412948218	6.26146812718714	4.51363106293227	9.72986448159255
											6.36271473707111	6.33876028621920	8.78612793955053	10.4650771239174
											7.01055080113349	6.50660649492426	5.59656173564224	10.5572954996331
											6.94305966711282	9.85911218969689	5.91216862306355	11.8340367227228
											6.34616447889493	7.85657431733953	11.8645298284782	9.35150755193521
											5.00318694877371	11.0527112411421	5.34026927372332	16.1566912833801
											4.87011393723466	6.04324480812926	5.97034729661058	12.0567284502242
											6.00519639672034	6.53355385363984	7.60070636807233	11.5224730502364
											5.98529465662264	6.66687204474265	4.72953178200445	11.0395878551720
											4.92457553811029	10.7486576454987	4.18233735251151	15.5794241612148
											6.01138395129101	8.06293328092759	9.06929249248934	9.04158625482396
											7.06997649496238	6.49590147341352	4.89526842147977	10.0547056729718
											5.91949392200771	9.09529655318568	7.35441569116114	13.9630716980175
											5.92848318802063	7.57625037371453	6.63879906826248	13.3993773210425
											5.77646658777429	4.10419903974070	8.38774185148855	7.71843872912512
											4.24620442333618	3.90511790996459	7.97545828890471	12.5118613683185
											6.49380371095550	5.00742681777962	6.17621307319086	11.3115438551624
											3.36930663957551	5.92610609424713	4.60688701639135	12.6206997657360
											5.26634544424872	8.03455413211074	4.79514810029521	14.5156398434452
											4.85161101781408	5.69898774076748	7.17675102645041	8.86118443641201
											4.78417357990317	8.66188297498328	7.17212175852822	11.7047019510619
											5.29183110603166	6.63554938781135	5.91952095284409	16.6266258070652
											5.91617447651964	8.18695169102557	6.76835395885233	11.7118423448960
											4.66704620239082	7.95984781490893	2.00564207395602	8.38644799419609
											7.63291366392006	9.41946100673636	5.85838585568444	10.4946766890430
											6.07911550149515	9.36212577451770	7.59008924357583	11.5727010649043
											3.68547851079542	6.33266089660967	4.16188219610159	12.4256500930077
											5.98808887264830	5.60140783748454	5.55992728156209	9.35673814827105
											5.41313472120738	9.41127209292330	6.82242677174779	12.7743327914266
											6.94938939318993	7.44817966055162	5.85964881902131	10.9259179814040
											8.14659266798858	11.3230292965991	8.54160228560460	10.3732655348694
											7.81141083445839	9.65138658209820	6.98926301774589	13.2629680958859
											4.33444193262690	8.54229741896458	8.03639163170353	11.7667995296601
											5.84345602523159	7.13271446981265	5.78028225465235	10.9461041248432
											8.15376240612710	10.8811122510579	8.25603286986999	14.1943788752869
											6.45146330343202	8.56021990643229	9.06811212761140	13.8840359680763
											7.45801335948909	9.84966922526023	7.72666307107905	10.8889740138558
											7.55819867100260	9.25575206916789	5.03524769880630	13.6159613612895
											4.73866086476531	5.89947504459903	10.4964995226386	10.5563829397458
											9.01827797231136	4.04841708219215	7.43406653743180	9.06790963538513
											4.74953056433167	8.91173931974664	3.97353942490135	12.5332288502622
											6.82245407878513	9.40553600880285	7.58682744548186	14.0860004332803
											5.41026101759891	6.70967033044705	5.29671978215428	9.21374016534717
											5.09640755066348	3.88100361239173	6.53186426901976	6.71712782440444
											6.30032007057356	7.08405810857918	5.28703904928441	13.9400789542635
											9.98485997112404	8.05472305722955	7.51915220043678	11.5516507137287
											6.70050643073435	8.80739808838073	6.20927728746128	11.8068223014404
											5.50064264845848	9.56573435438588	7.45257162095189	12.9238715205642
											8.21693569761045	7.68661098987710	6.23141510465356	10.6597029170352
											7.23599214931049	7.48200162225274	6.26316252411662	12.3997841121685
											8.29954234463863	3.23896917271218	3.42962824711570	13.0687736275552
											5.92792231223832	6.47164985508514	7.44201440861306	13.2999868684023
											4.95063389266734	11.3535864801739	6.53575645663899	11.9792968628226
											5.77126734410669	4.95291481025408	7.03236332523552	14.5461231441124
											5.99516093343820	6.08166568547010	8.67322262858368	12.0348665711231
											7.53728299061658	9.46047574342345	6.24070033020502	8.14670451538314
											5.83173468233493	5.51002999358184	5.65869321175032	12.0685074468619
											7.76196915282226	8.34350948131581	9.32911352411812	15.0839881497648
											5.63214779267408	8.33446138938063	5.29342943774845	12.1413792029380
											4.08357394368951	7.20056068566820	5.64789970398831	10.4276249770982
											7.62531293530375	6.50821487054124	9.10575012028864	10.5339435435912
											8.62916508269569	8.04619604325044	7.80754439228137	11.6949227946729
											5.05409193251772	9.31520264046022	5.93947338208558	11.4220190284570
											7.45655311313101	8.35848495224058	4.44084241614751	10.8196450320808
											5.21673214817593	9.13697703854746	4.04813256462072	13.3301947012267
											7.90352833065175	7.99510839486802	7.11284224447490	13.0356829933382
											3.04824654346694	7.03741431093727	3.55723642641667	11.4656109649321
											5.33265686437646	7.85235514134287	7.16804848174574	12.5961282611636
											4.53264074837747	6.90299603605257	8.22530682094507	9.67433073257971
											6.07456190099665	10.4478767271770	5.84710231568217	12.1370275370269
											5.28683289077462	9.06744911042493	3.96592969974554	15.4626796423575
											4.26980625910881	9.18230102999356	8.20175638738800	11.2327063263703
											5.89214558974541	9.75346280452375	4.86812299112858	14.0521918022325
											7.50280201858162	11.3477330229327	7.11972940089969	11.1565843366695
											7.33493894025228	7.72940489207284	6.13916075283392	9.47373557748348
											7.72021589280232	7.59497097266357	8.11518467628842	12.7209400057352
											5.73677712814264	7.31814370454746	5.63633170569954	11.7175334956485
											5.91077340061690	3.25206101224847	5.74850206208512	12.9072448496532
											6.93072576514795	7.89965915955649	7.13617190680046	13.0490019822812
											6.70496162228519	6.68282384287355	4.50434157293766	11.9855649096294
											2.47479868618659	6.32197976016936	6.13659766249473	8.30723856256248
											5.90172216459621	9.74039303995540	4.54401991551884	12.5322348588222
											6.17070840886756	9.78606231705130	5.40100473149768	12.5118180571397
											5.50442094740505	10.5300631781815	5.95736101072764	9.95578551376224
											7.92705177902963	6.61706013967197	5.54938548913604	11.8545087196144
											8.05543063780909	4.95489659444075	7.66521712019474	12.2569843130583
											6.91032715328803	9.47383188586968	5.83819026500931	8.09707390041093
											5.34400476559008	9.78495245878557	6.57896324965424	14.2925915825243
											6.61198352719821	6.26772850450150	6.68308429930269	11.5244912816784
											7.84521167015593	9.94817048177614	7.89802739159997	11.9560372798507
											5.35085837092567	7.63490828392540	8.34654379216092	13.2120951824853
											8.49504328907737	8.60663511365909	6.70032405545660	10.4095600452867
											4.20710924238816	7.41709340347124	4.81560163709006	13.0992054234774
											8.62271148518071	8.00726130005222	7.27445937992171	11.6280791488006
											6.42428471562024	6.22400677629685	8.37460986251231	11.3321443984200
											5.28791737723751	8.37991553684783	6.17055724238075	12.5509237899833
											4.81514876643448	9.19751940223736	5.30225608134661	12.9862213541405
											6.98733332399947	3.98686092354799	6.93898883538982	11.0815483893372
											7.68554870468154	7.80716698945071	7.87002815316847	8.20730714040142
											7.17727507274789	6.27518596714753	9.81941993887707	14.0690953323126
											4.87753836906861	8.75123087329652	5.79496977112642	11.8418264076032
											5.30970222605121	8.20054530275886	7.06354146903424	11.7650502798736
											8.97641653987879	10.0527284235575	6.08645942892378	15.0256791317778
											3.67317587002324	6.15512353585798	5.92568452199976	13.8554036911935
											4.43720735684019	6.60293837551618	3.98254685665572	14.8306113787756
											4.80477596288434	9.28042547465741	5.46329148053454	13.8329236018582
											4.47850250312889	13.7703258888820	5.40341294984387	10.7989473448794
											5.59463783881320	7.92335405811130	5.31690106168659	9.44044294073074
											5.05059620619288	7.63704625346300	6.67521327737584	12.2354922580122
											3.73283877757149	9.06390862175207	4.93022589632288	9.87651361335681
											6.75256739565342	5.97032498792486	5.85090990681321	13.0705697556928
											8.88740595387816	8.08014778630199	7.76156910094807	7.73893105880892
											7.43467019361763	9.09475544067612	8.92556569097878	10.5335603512296
											9.12479886631622	8.71542107592848	8.32722470519818	13.3739613986569
											5.90503083803490	7.78083971960421	6.64876738695614	13.8784071690985
											3.52706563862719	6.19562005827439	4.87727311297474	9.48951978857818
											6.09253444125920	3.44527262272102	6.04019613860078	10.5558628841247
											6.86626027399456	6.17892522816321	5.58783136083361	10.7786553397304
											6.64938853214500	5.72516686012238	5.14299121363143	13.7804585252120
											9.42429347137766	7.06621979740827	10.2577147463071	9.69522758900179
											5.39445029182203	7.25504495924739	9.54461627113052	8.86535090448167
											4.67401937971912	9.78076575902995	6.36037313930414	12.3959977818802
											4.99089272080861	8.09552558133268	6.49352338719854	11.9707759100826
											4.29830854828209	7.84461889628027	5.33388156367433	11.8924982279908
											8.56295829396465	9.36904295544995	7.13619329148331	15.3753038956404
											4.95019698495611	8.65669905924462	5.39616963180359	11.3528161918433
											6.83446830111033	5.26483849212491	8.08915189874269	6.82928251356464
											9.82568749785074	5.54277778238896	7.21641601510126	11.5383391419156
											5.25574360383340	10.2744621664938	4.56462363339505	13.3913262180242
											8.61176826190809	4.61500416728951	6.36216974378658	7.30225580488644
											7.16257486588889	6.37608650561164	8.37643484393895	12.5636663810983
											7.25987565910175	4.35928458416240	5.12096340117237	12.0485126986448
											7.52435499363915	8.88199325045919	9.00254236366199	13.5921105969004
											6.09442231729957	8.72752562297315	7.56336187153497	16.2426597053339
											3.79177774452052	9.87967682037068	5.33378357782363	15.2401865243722
											5.19074521970911	10.5195196983733	3.41773975294740	11.7529474451367
											5.76712145999188	5.60460472656610	6.76300798143289	11.3581871667144
											4.36943203511090	9.95086630922492	4.26357163087625	13.1370499105586
											4.77494221259692	9.85723243474057	9.17631263433287	12.1328960402518
											4.12627720501962	9.27670849377857	8.24347950299954	17.2535633925433
											8.58796853920580	9.22379801139487	6.72315529826113	13.9160248692197
											3.39981855233143	6.50542713178369	4.53459672553577	12.3774854329454
											5.91360498996115	6.84838994001262	8.04468719341442	11.6799602345443
											7.16444336176260	6.56206425933747	8.65616435220284	13.4959950452508
											3.98292271924519	5.58213534662541	4.44178595737475	11.6912412237361
											2.70635137168298	8.03090375947333	4.19392573660299	15.0032641606261
											4.55229917541490	10.3216281139654	6.51235138818128	14.2552947440277
											4.67445283198599	7.37446555555229	7.07847283837761	12.1614363613921
											7.38264899656471	9.12108036929217	7.53002319485546	11.1805912963630
											5.66267454674325	7.73896046135873	5.78993054424106	11.4431964977391
											6.80896698299707	7.15285340889770	7.86800487185434	15.5220694553604
											6.07122301583545	9.02183335962714	7.88348814648984	12.0001705448817
											6.20184872695773	6.57250066196879	7.84389801362423	7.60736054458145
											4.77279363185490	5.67203486289936	6.93339749652516	15.9901757402132
											7.19969542637443	6.94825842354964	5.14568780785113	10.7253799321842
											7.22800666195426	9.07124632664556	6.73554182206596	11.5386461789944
											7.18965172831830	7.77068445570901	7.32232928458336	14.8222537948554
											4.05817338448346	8.75013143898261	3.43405955244252	14.4643443888274
											9.04481947494765	7.01697287029292	8.08824977795863	11.9005762560813
											8.19982499534503	8.09103565439214	7.64458984140849	15.2483842371791
											7.89408922592425	12.3522412414338	5.89193979451128	13.5790421636475
											5.24269001715156	6.57681086340763	4.10910276737227	13.2151497334306
											5.27111399795202	6.06060371949243	5.62542071087272	11.3244507075139
											4.83340696396372	6.49355862386236	7.11816449687846	8.22516346678975
											7.07911910575131	5.44865240899683	6.48670389583599	15.8793505091886
											6.86912721246305	8.53503105521661	6.40813236708023	12.2829512813985
											3.98563456726452	6.83902231489257	5.71489563150743	11.4117711928676
											6.37835468556898	6.74181744900229	8.28649321534140	11.5489498414220
											8.00043827797169	3.99158519259932	5.34253576092847	12.3329102798063
											7.89109269003934	7.12897580414860	5.44346497186988	14.1664097935059
											8.10057485974783	11.4993475261186	7.79918357516522	14.8074313257820
											8.49657117060982	9.10839787085204	6.90759456210543	11.7562528301388
											6.04924067111328	9.79430592640732	7.41143885794714	13.6308716514672
											4.98269299417199	5.70972491129114	4.98207561418537	11.5798283198404
											5.21147004196396	7.19455544523278	5.77788943644101	12.0441698446154
											6.55093863694170	12.6300198773853	6.16101836809409	13.5227660693388
											4.90085565416282	8.73061221311262	6.19725573887077	14.4646560426315
											5.88763845257664	6.91455086327306	7.72973589178837	11.6241796219268
											4.62474476558710	8.85741262763721	5.00454619161884	11.3751215214484
											2.52406719391568	5.62056603698683	4.59051037667540	13.1619904455643
											5.67023996877327	7.95845426518303	6.90918197470848	12.8757828902212
											5.62096853341434	7.98725041877919	5.01968625272374	11.8069670581048
											5.68825999596394	11.1546833434599	6.71363197600499	13.0790172218804
											5.49132997578455	9.01848883650541	7.80498440712081	9.83787756772686
											7.26581214753718	9.89418072866360	7.74714013961349	9.97613326966748
											4.33390348726240	8.01818088454858	4.45309316721649	17.8038516689392
											8.34544818385186	8.75878576662172	6.83894042411420	11.2123923651905
											4.70585257044292	7.56173127151673	6.03711639385318	14.0218589236093
											7.34564811967959	3.31751865750514	7.03420251632477	10.3566716962902
											2.40826614857324	9.67957966768639	5.54702763146808	10.7575509410788
											7.69028739902366	9.88921478169885	5.13219494398151	13.5088854088132
											6.06312697469612	11.1035510611033	6.49010751331315	15.4656128805878
											8.40691317912003	7.03578431158158	6.53893946701212	10.7987764137973
											7.28275679758791	4.62937361112285	5.62390833887209	15.3676664672116
											6.16583935609813	11.3625709051502	6.77399125622789	13.3759539801262
											4.02726380091492	5.89939846201565	4.82555047752060	13.6327688530359
											6.88288395212883	7.01326558311204	6.21595701382856	12.5118916292181
											6.46817383671853	13.3764140127537	2.92286552000221	11.6698508178417
											5.04660582048834	4.62055882652486	4.65414829604924	12.5633699540062
											7.73425201040311	11.3043134149029	8.62147922564795	14.8812808351200
											6.29400889754599	4.50034084172370	6.89259086245575	12.6807777280588
											6.48841307469675	10.9111795331502	6.13387792847698	13.9478946462371
											4.96891500582779	11.7498277836728	8.09951513270825	11.9198793763966
											5.98862966165422	9.52164108570735	8.31173314212534	14.5873753665490
											5.49686836519613	9.57470842778180	6.32418013508856	13.3054572092982
											3.80330395057330	9.91441090270254	5.55310902130322	10.0524417238491
											6.60121324337944	7.17978086267000	5.59400878601185	12.2233263585100
											5.96288902817562	7.13051133412993	6.40349082475633	11.3896694268064
											7.25388651011714	7.83746939852256	5.60783719317024	12.2746108450574
											4.98072125858354	6.28882460394289	6.56907780509803	9.86964248517318
											6.79942311911668	12.7115880545248	7.51600016930355	12.1259210228832
											6.84936779868667	7.47705723840461	3.77569052950809	12.6030684014796
											5.87704831916772	7.09020233108149	6.96669909824786	8.09663678707164
											2.97587921662651	7.48249120404082	3.65780938295089	13.5703674418925
											5.12372366308013	5.52083038091340	6.35727208022635	13.2019416403804
											3.87288065641601	5.88321675736859	5.54925711180412	14.0140363704712
											6.34794955247524	11.8104078235429	5.22919236761930	12.4340104721513
											5.24328708335474	6.89286306073058	8.11640703436065	14.9331881914020
											6.04938329251062	1.00574854091672	5.26649269763001	9.40335725884446
											6.72412983183622	11.0792818345921	5.36667182039066	8.86925392203026
											6.06561147464994	9.61943936389796	5.16316415914451	16.3472449829210
											6.71924864639631	7.07491579446036	6.64781204367322	9.66309782331679
											6.14927590007598	5.01123974987439	4.93714348287671	8.60835867766300
											7.05736378285637	5.83401670663338	5.91442025702078	8.87698578985780
											5.24400640871986	9.75377613791873	4.12622803969227	14.0479797703079
											5.56677840799747	8.04937861402871	5.49007060841931	12.9744183419081
											6.46821961099123	8.14512532219410	6.90173019535237	15.5520193171079
											6.77337525460423	8.10713235135676	4.61884374963669	13.1096758631638
											6.90974546895218	8.74900497790508	4.14386153894337	9.78587178120413
											6.38324119724786	10.1365113766823	6.07604829277446	11.3986153038376
											3.90315414957582	7.19187384740840	7.63322003357128	12.6827181943018
											4.59520170322552	4.42884402051131	7.20301918137565	8.77221316522752
											4.20327379604939	9.92516901221428	7.52278595254364	12.3969100367343
											9.09171394896292	9.27742701358877	8.47920982852583	9.32840380752613
											7.51883600124685	11.0255106679179	6.38909192808336	11.8722027743762
											6.01862955955070	8.71638146855288	3.75274177143323	8.38280640922061
											6.60427200243132	5.94893126609717	5.57664217823460	8.38056488017530
											5.59371641680055	6.48607281177153	4.24634346721248	12.1187769921599
											5.86444915373922	5.61262314584314	7.62274721078697	11.9895514260223
											4.64005152043574	7.48601113952162	7.86520346370743	14.3911196128975
											9.43134649393365	6.31764831227583	6.13482781270932	10.5460388581249
											3.14024633933962	9.44083367666535	6.91650507683334	13.7004172701310
											4.78486930842006	11.5116685682899	5.29544930867932	9.99482983824636
											5.58098503270777	9.17106985813089	7.02041561871508	17.8401452880717
											5.50180008603213	7.83779383455530	5.81526160919549	15.6101486634305
											4.74715403128978	9.72144767658291	6.58589249368288	11.5745928259657
											5.27315413516619	10.7379778982178	8.39438668698833	17.2841515170317
											5.58213144061891	10.8515844928847	6.19288013075829	12.7172048730741
											7.85914919913509	10.9083993678008	8.64450240380141	12.1209263663089
											6.23600767753054	12.1496527788722	5.58997040199015	11.5719537674412
											4.96795008226710	10.3270744987189	7.64198254000415	13.8324927652135
											5.38155692790868	6.46390999587904	7.99815931753408	13.2026060573981
											4.79350650055648	6.55581839562570	5.60294626378666	9.81446253877412
											8.57074879031921	9.04076006586897	8.11526180696527	11.2384181631059
											5.54820477434719	3.76003793781880	7.91228055585305	10.5479403044293
											7.60957987003984	7.32821711836846	8.07806752618209	10.9066537446104
											7.48812418896220	11.3029278232921	8.38200308063049	12.0108503264731
