# Supplementary material for: Effects of experiencing the COVID-19 pandemic on optimistically biased belief updating
Source: eLife. 2025 Jun 30;13:RP101157. doi: 10.7554/eLife.101157 (PMC12208662; doi:10.7554/eLife.101157)
Supplement: Figure 2—figure supplement 1—source data 1. [file elife-101157-fig2-figsupp1-data1.xlsx]

## Sheet: Figure 2 - figure supplement 1
		before													during
		model 1	model 2	model 3	model 4	model 5	model 6	model 7	model 8	model 9	model 10	model 11	model 12		model 1	model 2	model 3	model 4	model 5	model 6	model 7	model 8	model 9	model 10	model 11	model 12
Figure 2 - figure supplement 1b	Ef	0.736293	0.00287374	0.00287357	0.00287356	0.161017	0.00287377	0.00287367	0.00287367	0.0768271	0.00287372	0.00287356	0.00287356		0.089277	0.216152	0.00287391	0.0028736	0.0610705	0.00287373	0.00287365	0.00287364	0.00287367	0.610511	0.00287359	0.00287359
Figure 2 - figure supplement 1a	model attributions	0.999998	2.49753e-07	1.70857e-17	1.74178e-17	1.68715e-06	2.74152e-12	1.43687e-13	1.45245e-13	2.76394e-09	1.01801e-14	7.57524e-17	7.63043e-17		0.0862833	0.250429	4.65236e-07	4.64876e-07	0.0127281	5.24382e-08	1.029e-07	1.029e-07	1.68127e-07	0.650558	9.21272e-08	9.31678e-08
		0.998857	1.69371e-07	7.33948e-08	2.17024e-08	0.0011412	1.18339e-09	3.71102e-09	3.58298e-09	1.46671e-06	4.90028e-12	1.4308e-11	1.43238e-11		0.000206204	0.00170932	1.50435e-37	3.59769e-39	0.00246249	1.94232e-08	1.29633e-26	3.74139e-27	1.2772e-07	0.995622	3.59378e-26	6.98727e-27
		0.970767	3.84477e-11	8.55249e-19	2.98964e-21	0.0286614	7.6254e-10	1.25134e-10	1.25632e-11	0.000571376	1.43924e-10	5.54347e-13	2.21256e-13		4.29799e-07	1.59022e-06	3.40791e-23	3.82383e-23	4.25261e-07	1.71997e-12	7.57253e-18	9.36875e-18	2.23988e-07	0.999997	2.73094e-13	2.64193e-13
		1	6.91022e-12	1.89694e-16	1.52928e-20	3.57155e-09	3.39096e-15	1.10669e-18	2.07326e-19	1.19447e-07	2.01547e-13	5.54147e-18	6.90845e-19		0.00510107	0.091062	8.87721e-49	4.41833e-49	0.00916861	1.15139e-07	1.15711e-44	1.27705e-44	7.80341e-08	0.894668	1.06759e-47	2.15411e-48
		0.561529	1.36458e-07	3.22403e-18	3.22775e-18	0.316548	4.07531e-07	6.61842e-13	6.6245e-13	0.121922	4.47643e-07	4.60831e-14	4.61319e-14		4.62265e-05	0.000459808	2.72219e-23	2.73551e-23	6.89911e-05	5.31841e-10	2.26554e-18	2.2797e-18	1.46082e-07	0.999425	2.97289e-18	3.51845e-18
		0.338975	3.8236e-10	4.59132e-27	3.93564e-29	0.64186	3.7076e-08	1.19755e-19	4.98677e-20	0.0191654	7.5015e-09	1.95917e-22	1.12797e-22		0.0215784	0.238334	2.30467e-43	1.72949e-43	0.00187538	2.62562e-07	1.76881e-37	1.77467e-37	1.16625e-08	0.738212	1.54706e-39	1.55196e-39
		0.996033	4.25946e-07	4.61285e-18	3.25111e-18	0.0038123	8.33716e-09	7.21574e-10	7.22898e-10	0.000154699	9.99051e-10	2.85644e-12	2.85921e-12		0.345771	0.654215	8.85152e-06	4.54709e-08	5.49855e-06	2.2863e-11	9.77116e-11	1.03175e-10	1.26114e-18	8.61042e-12	6.06084e-18	1.0445e-17
		0.805331	1.2689e-07	4.15032e-22	1.90259e-25	0.150031	1.28827e-07	1.79237e-18	5.55009e-20	0.0446371	1.14015e-07	2.77697e-19	9.42274e-21		0.000217754	0.0942442	8.09635e-92	8.10146e-92	0.00158158	1.19074e-07	9.24802e-75	9.26177e-75	1.21614e-08	0.903956	1.21154e-75	1.21333e-75
		0.026808	3.02546e-08	7.4212e-16	7.50862e-16	0.786792	8.79588e-07	3.03318e-07	3.95647e-07	0.186398	7.85612e-07	4.27957e-10	7.04053e-10		0.0954282	0.904572	4.85362e-25	4.87667e-25	1.23846e-07	2.56123e-12	1.45816e-21	1.46237e-21	2.0425e-16	2.53494e-09	1.75195e-34	1.75492e-34
		0.287192	2.90158e-08	1.73389e-23	6.94723e-26	0.1617	1.31719e-07	8.5689e-18	1.83406e-18	0.551106	1.27697e-06	4.46e-20	2.32274e-20		0.00496681	0.0310859	1.53547e-24	5.99442e-25	0.149256	9.82497e-07	8.38984e-17	2.66183e-17	1.23719e-07	0.81469	2.79504e-18	8.03189e-19
		0.999576	1.49136e-06	1.34026e-08	1.34574e-08	0.000127787	1.7056e-10	1.17551e-10	1.17643e-10	0.000294963	9.62039e-10	5.08013e-11	5.08445e-11		0.0613931	0.180991	2.51281e-07	2.51122e-07	0.192529	3.67014e-07	1.41718e-06	1.41728e-06	2.37592e-07	0.565082	5.14098e-07	5.14152e-07
		0.998868	1.01173e-07	4.73458e-14	4.11938e-14	0.000961572	3.70835e-10	5.17012e-11	4.29702e-11	0.000170331	1.44878e-10	2.18262e-12	1.78527e-12		0.000144744	0.0379248	2.32282e-23	3.08353e-23	1.77571e-06	9.93967e-12	1.94416e-19	1.95372e-19	6.3012e-08	0.961929	9.22015e-11	9.29065e-11
		0.656716	1.03573e-08	7.15734e-15	2.27734e-15	0.121545	1.60175e-08	5.06891e-11	2.24714e-11	0.221739	1.0536e-07	2.5086e-10	1.11669e-10		0.135584	0.461667	2.24832e-07	2.33454e-07	0.0450877	1.69907e-07	2.7974e-07	2.79745e-07	8.70207e-08	0.357659	7.75859e-08	8.11044e-08
		0.999998	1.46348e-07	6.91693e-11	1.26609e-14	8.40878e-07	7.22908e-13	1.03548e-13	2.19112e-14	9.4663e-07	2.67536e-12	1.56933e-14	7.75713e-15		0.000754379	0.0490157	7.3756e-76	6.95312e-76	0.00167932	7.83611e-08	1.07034e-68	1.17078e-68	1.74851e-08	0.948551	9.83717e-66	1.07628e-65
		0.923717	2.75211e-07	3.7228e-12	3.72715e-12	0.0619978	9.11897e-08	2.58032e-12	2.58275e-12	0.0142844	5.41625e-08	1.27913e-14	1.28054e-14		8.35745e-06	0.309336	1.55019e-39	1.13955e-39	0.101485	7.28945e-07	2.75916e-22	2.02203e-23	3.95978e-09	0.58917	2.90715e-26	2.913e-26
		0.913631	4.52293e-08	2.72341e-17	2.3132e-17	0.0734261	4.79278e-08	2.98274e-13	3.53091e-13	0.0129425	2.87481e-08	1.11307e-13	1.11377e-13		1.60543e-10	1.30285e-09	7.55267e-49	7.55663e-49	1.74339e-10	1.73147e-15	2.64273e-30	2.64461e-30	2.39452e-08	1	5.10788e-24	5.11138e-24
		0.437044	4.84433e-07	6.20114e-36	6.21281e-36	0.484675	8.52348e-07	1.96263e-20	1.96598e-20	0.0782793	3.20757e-07	3.15716e-24	3.16239e-24		2.19882e-17	2.93089e-16	1.47342e-62	1.4749e-62	1.3148e-17	1.02975e-21	1.35772e-57	1.36043e-57	5.37027e-07	0.999999	4.55237e-32	4.56696e-32
		0.891717	1.1343e-08	2.97174e-19	4.37703e-24	0.0159072	4.69979e-09	4.1844e-12	8.49596e-15	0.0923757	4.57406e-08	1.34317e-15	4.91012e-19		0.0464327	0.953533	1.81262e-07	1.85907e-07	9.16054e-06	2.96606e-11	2.81551e-10	3.01671e-10	6.15105e-12	2.49548e-05	5.51297e-11	5.78795e-11
		0.81061	2.5457e-07	3.43796e-09	4.63031e-09	0.188258	2.34025e-07	1.0968e-06	1.1985e-06	0.00112961	3.54389e-09	1.72732e-08	1.72831e-08		0.820735	0.0027861	2.44336e-47	2.73044e-49	0.0365577	1.32623e-09	1.02864e-36	3.05802e-37	1.78321e-07	0.139921	3.10133e-37	2.15988e-37
		0.989552	1.60183e-07	6.5773e-15	1.52235e-15	0.00031626	4.15593e-10	1.23275e-11	1.21053e-11	0.010132	3.87011e-08	2.5808e-12	2.63152e-12		0.128565	0.634209	4.92387e-16	6.87062e-19	0.0133461	6.02412e-08	1.19228e-11	8.32927e-12	2.66942e-08	0.22388	2.16704e-12	1.28568e-12
		0.999824	2.97356e-07	2.70397e-13	2.7123e-13	0.000150321	1.96222e-10	3.47518e-13	3.47813e-13	2.58122e-05	7.7597e-11	3.425e-14	3.42768e-14		0.0427492	0.282758	9.62178e-45	1.47188e-50	0.0646415	3.12694e-07	2.87603e-38	8.01515e-45	1.46372e-07	0.60985	1.22456e-42	1.7396e-48
		0.983572	4.4517e-08	8.62949e-15	2.08797e-15	0.0153526	9.61817e-09	8.33434e-11	2.34892e-11	0.00107496	3.28296e-09	3.23928e-16	1.46437e-16		0.00194057	0.00186408	6.4173e-21	3.22458e-21	0.996145	1.01476e-06	6.10121e-07	3.91929e-07	4.76124e-11	4.80409e-05	5.2694e-19	5.29836e-19
		0.335693	2.05557e-07	4.59663e-16	3.15616e-16	0.664281	1.94491e-06	1.35621e-06	1.36837e-06	2.02358e-05	1.97567e-10	3.77299e-12	5.37285e-12		0.605082	0.282845	1.08051e-51	1.08137e-51	0.0120338	3.65454e-08	4.29052e-39	4.2964e-39	2.50376e-08	0.100039	1.16611e-42	1.16773e-42
		0.995003	9.3852e-08	7.28175e-14	2.61666e-14	0.00360389	2.94371e-09	1.81791e-10	1.31644e-10	0.00139286	4.52779e-09	6.05439e-13	6.0572e-13		1.32531e-26	1.31438e-25	2.08126e-69	2.08303e-69	8.9057e-28	1.56972e-32	8.14663e-57	8.15705e-57	1.13227e-07	1	3.13151e-25	3.48459e-25
		0.979427	1.64879e-07	8.23487e-31	8.2522e-31	0.0140206	1.76009e-08	1.35398e-22	1.35612e-22	0.00655247	2.11398e-08	4.43266e-23	4.43985e-23		0.0039202	0.0361784	6.63212e-43	6.6373e-43	0.00809516	6.16338e-08	2.72662e-29	2.73089e-29	1.01092e-07	0.951806	1.21152e-32	1.54505e-32
		0.357018	2.94442e-08	8.69191e-12	9.96665e-12	0.000183655	9.99331e-11	7.64575e-12	7.79109e-12	0.642798	1.15664e-06	1.52443e-09	1.52554e-09		4.0579e-11	5.07752e-07	7.5978e-51	7.60794e-51	0.00310517	4.94121e-08	1.34577e-34	1.35096e-34	1.80777e-07	0.996894	2.90841e-35	3.59489e-36
		0.0166129	6.37208e-09	6.11978e-23	6.12787e-23	0.845902	1.09591e-06	2.22409e-07	2.2254e-07	0.137483	2.22119e-07	1.52931e-08	1.53535e-08		0.0987911	0.685858	2.79412e-28	1.75408e-30	0.0358469	2.80184e-07	5.50158e-24	3.21242e-25	1.96852e-08	0.179503	3.24182e-26	5.1488e-28
		0.995086	2.72713e-08	1.00022e-15	1.43882e-15	0.00491254	2.87334e-09	1.7938e-11	2.37935e-11	1.8045e-06	2.871e-12	2.91699e-17	3.71573e-17		3.20955e-08	2.80939e-07	1.01465e-46	1.32769e-46	6.42518e-08	2.43793e-13	1.42179e-35	5.27751e-36	3.28763e-07	0.999999	1.02927e-29	5.90703e-30
