# Supplementary material for: Effects of experiencing the COVID-19 pandemic on optimistically biased belief updating
Source: eLife. 2025 Jun 30;13:RP101157. doi: 10.7554/eLife.101157 (PMC12208662; doi:10.7554/eLife.101157)
Supplement: Figure 2—figure supplement 2—source data 1. [file elife-101157-fig2-figsupp2-data1.xlsx]

## Sheet: Figure 2 - figure supplement 2
Figure 2 - figure supplement 2	Model recovery
		model used for simulation
		model 1	model 2	model 3	model 4	model 5	model 6	model 7	model 8	model 9	model 10	model 11	model 12
model used for recovery	model 1	0.850251	0.000541143	0.000541138	0.000541143	0.000541147	0.000541146	0.000541136	0.000541135	0.000541126	0.000541126	0.000541126	0.000541126
	model 2	0.00582066	0.668639	0.000541137	0.000541146	0.000541144	0.0537702	0.000541134	0.000541137	0.000541126	0.000541126	0.000541126	0.000541126
	model 3	0.00556236	0.0683038	0.994047	0.566599	0.000541136	0.000541152	0.0109433	0.000541149	0.000541126	0.000541126	0.000541126	0.000541126
	model 4	0.000541144	0.0120274	0.000541141	0.415005	0.000541135	0.00054114	0.000541145	0.000541149	0.000541126	0.000541126	0.000541126	0.000541126
	model 5	0.0958111	0.00415651	0.000541144	0.000541166	0.838619	0.0313251	0.000541144	0.000541137	0.000541126	0.000541126	0.000541126	0.000541126
	model 6	0.000541144	0.243085	0.000541144	0.000541171	0.0266711	0.757273	0.000541141	0.00054114	0.000541126	0.000541126	0.000541126	0.000541126
	model 7	0.000541145	0.000541145	0.000541153	0.000541148	0.0870456	0.109642	0.983645	0.586684	0.000541126	0.000541126	0.000541126	0.000541126
	model 8	0.000541142	0.000541145	0.000541151	0.000541149	0.000541143	0.0193462	0.000541142	0.407905	0.000541126	0.000541126	0.000541126	0.000541126
	model 9	0.000541144	0.00054114	0.000541129	0.000541135	0.000541145	0.000541145	0.000541136	0.000541135	0.783826	0.121566	0.000541158	0.0265153
	model 10	0.0387669	0.000541141	0.000541129	0.000541134	0.043335	0.025397	0.000541135	0.000541133	0.210763	0.830277	0.000541158	0.000541147
	model 11	0.000541142	0.00054114	0.000541135	0.000541148	0.000541155	0.000541156	0.000541144	0.000541142	0.000541145	0.01043	0.939206	0.615657
	model 12	0.000541142	0.000541139	0.000541135	0.0135258	0.000541155	0.000541158	0.000541144	0.000541142	0.000541143	0.0333973	0.0553824	0.352957
