# Supplementary material for: Effects of experiencing the COVID-19 pandemic on optimistically biased belief updating
Source: eLife. 2025 Jun 30;13:RP101157. doi: 10.7554/eLife.101157 (PMC12208662; doi:10.7554/eLife.101157)
Supplement: Figure 2—figure supplement 3—source data 1. [file elife-101157-fig2-figsupp3-data1.xlsx]

## Sheet: Figure 2 - figure supplement 3
Figure 2 - figure supplement 3	Observed and Modelled updating
participants	observed updating	modelled updating
1	12.5	13.4691
2	23.125	21.898
3	12.825	9.59726
4	7.775	8.50286
5	7.85	5.05515
6	4.4	4.65458
7	10.1	10.1743
8	1.9	3.07231
9	15.35	17.118
10	5.075	4.09979
11	10.2	13.0364
12	6.4	10.4322
13	9.275	8.7632
14	9.8	11.8224
15	9.875	8.17666
16	8.65	10.1806
17	8.5	11.0921
18	4.425	4.46674
19	4.125	3.73856
20	3.45	3.39484
21	14.35	14.27
22	9.775	9.2566
23	13.45	13.1733
24	7.375	4.88894
25	12.7	11.9931
26	7.725	7.71573
27	5.025	4.22792
28	14.4	16.5736
29	4.6	3.70839
30	14.1	12.9506
31	1.025	1.50343
32	6.15	5.60866
33	6.25641	5.07448
34	-0.615385	1.72079
35	11.55	11.5633
36	9.6	10.0431
37	12.675	7.24741
38	14.85	13.8477
39	43.025	23.5128
40	12	14.1141
41	7.85	5.27613
42	11.0769	12.0103
43	2.5	1.97059
44	13.5385	12.6657
45	2.075	1.5207
46	3.175	7.77133
47	6.125	4.46263
48	24.9459	25.3465
49	22.425	26.7886
50	8.55	7.30069
51	15.1795	14.6591
52	10.0256	14.3213
53	4.55	3.60179
54	10.1	8.31464
55	4.95	3.74198
56	11.875	9.25745
57	8.53846	8.45626
58	5.19444	6.68382
59	10.575	11.4174
60	1.925	1.74919
61	2.225	2.33982
62	6.9	9.29805
63	6.85	5.97576
64	9.075	10.2311
65	5.725	5.34141
66	7.9	7.56129
67	14.625	12.6438
68	11.975	10.7755
69	1.375	1.34701
70	8.23077	5.35394
71	9.95	9.7281
72	6.79487	6.17173
73	42.575	30.435
74	11.55	11.0761
75	3.725	2.6166
76	2.79487	1.65722
77	48.725	30.1612
78	0.675	0.67825
79	2.95	1.36486
80	1.375	1.03294
81	6.8	5.58506
82	6.175	5.71362
83	1.95	1.75124
84	1.79487	0.731251
85	6.07692	5.01406
86	1.02564	0.953947
87	7.85185	3.39544
88	11.7949	8.16066
89	0.717949	0.552619
90	15.7368	16.3104
91	22.9744	24.9545
92	4.825	5.19142
93	7.44737	6.21315
94	7.475	5.97969
95	6.425	5.8926
96	0.85	0.0335121
97	8.45	8.59695
98	2.35	9.68561
99	11.925	12.4478
100	13.425	12.1438
101	4.925	4.49518
102	7.475	8.21233
103	15.4	16.6431
104	9.375	9.61416
105	1.925	1.80891
106	13.8	10.8999
107	11.2	11.6192
108	11.75	12.5558
109	26.425	24.2447
110	9.575	10.0154
111	8.975	7.32667
112	6.95	7.39137
113	7.85	8.32894
114	8.5	7.38726
115	5.65	4.75899
116	4.575	4.10346
117	13.225	15.0904
118	2.85	2.48718
119	11.05	11.3595
120	14.8	13.7395
121	6.725	7.49949
122	15.8	20.2545
123	7.775	9.20022
