# Supplementary material for: Effects of experiencing the COVID-19 pandemic on optimistically biased belief updating
Source: eLife. 2025 Jun 30;13:RP101157. doi: 10.7554/eLife.101157 (PMC12208662; doi:10.7554/eLife.101157)
Supplement: Figure 2—source data 1. [file elife-101157-fig2-data1.xlsx]

## Sheet: Figure 2
		outside													during
		model 1	model 2	model 3	model 4	model 5	model 6	model 7	model 8	model 9	model 10	model 11	model 12		model 1	model 2	model 3	model 4	model 5	model 6	model 7	model 8	model 9	model 10	model 11	model 12
Figure 2a	pxp	1	2.97227e-18	2.97227e-18	2.97227e-18	2.97227e-18	2.97227e-18	2.97227e-18	2.97227e-18	2.97227e-18	2.97227e-18	2.97227e-18	2.97227e-18		0.00039	1.8758e-14	1.8758e-14	1.8758e-14	0.0001	1.8758e-14	1.8758e-14	1.8758e-14	0.09738	0.90213	1.8758e-14	1.8758e-14
Figure 2c	Ef	0.766573	0.0014125	0.00141246	0.00141245	0.120741	0.00141249	0.00141247	0.00141247	0.0999741	0.00141249	0.00141249	0.00141249		0.14135	0.0192248	0.00126268	0.00126269	0.113989	0.00126268	0.00126265	0.00126265	0.29132	0.425277	0.00126265	0.00126265
Figure 2b	model attributions	0.999999	9.59125e-08	6.56296e-18	6.69023e-18	1.25033e-06	1.05265e-12	5.51801e-14	5.57761e-14	3.95674e-09	3.90925e-15	2.91036e-17	2.93157e-17		2.33085e-07	2.98733e-10	1.28551e-37	5.24958e-43	0.000141948	7.27871e-15	8.78635e-19	1.09357e-25	0.999792	6.53353e-05	1.12799e-16	1.29906e-23
		0.999152	6.50626e-08	2.82007e-08	8.33837e-09	0.000845981	4.54514e-10	1.42556e-09	1.37632e-09	2.1003e-06	1.8823e-12	5.49867e-12	5.50475e-12		2.54847e-06	3.73625e-10	6.28228e-35	9.82034e-36	2.77814e-06	1.31288e-13	1.46746e-23	1.92969e-23	0.911942	0.0880526	3.39137e-21	3.40462e-21
		0.977782	1.48717e-11	3.30892e-19	1.15662e-21	0.0213942	2.94905e-10	4.84024e-11	4.85931e-12	0.000823868	5.56674e-11	2.14516e-13	8.56195e-14		2.43296e-16	6.02783e-17	2.70874e-42	2.71463e-42	1.03545e-14	7.84867e-21	1.79452e-32	1.79947e-32	0.999541	0.000459427	1.16835e-15	6.21422e-18
		1	2.65372e-12	7.28653e-17	5.87399e-21	2.64684e-09	1.30201e-15	4.25001e-19	7.96164e-20	1.70995e-07	7.73955e-14	2.129e-18	2.65418e-19		0.0637339	0.00866622	1.75076e-14	7.52496e-15	0.0961452	5.51682e-08	6.9075e-10	6.80069e-10	0.293387	0.538068	2.62846e-12	2.52314e-12
		0.578503	5.39877e-08	1.27585e-18	1.27726e-18	0.241682	1.61208e-07	2.6185e-13	2.62081e-13	0.179814	1.77094e-07	1.82401e-14	1.82593e-14		0.951598	0.0477553	2.98197e-20	4.26912e-20	0.000550893	3.78743e-10	6.97659e-13	6.99358e-13	3.20324e-05	6.39211e-05	6.3815e-17	6.39452e-17
		0.402541	1.74373e-10	2.09434e-27	1.79517e-29	0.564877	1.69055e-08	5.46136e-20	2.27411e-20	0.0325813	3.42082e-09	8.93853e-23	5.14627e-23		1.28502e-05	1.79732e-14	9.87198e-34	8.60071e-35	1.57107e-15	1.09472e-22	4.1122e-23	1.38368e-23	0.998772	0.00121484	1.96057e-13	3.22414e-14
		0.99695	1.63726e-07	1.77352e-18	1.24991e-18	0.00282786	3.20414e-09	2.77361e-10	2.7786e-10	0.000221664	3.83996e-10	1.09844e-12	1.0995e-12		0.0351345	0.0049176	1.49512e-13	8.65034e-14	0.0028539	1.76817e-09	9.00272e-13	3.4976e-13	0.332817	0.624277	5.42465e-12	2.09468e-12
		0.821416	4.97025e-08	1.62606e-22	7.45383e-26	0.113407	5.04532e-08	7.02069e-19	2.17389e-20	0.0651768	4.46571e-08	1.0882e-19	3.69246e-21		0.784209	0.205509	2.01662e-13	2.04127e-13	8.92837e-09	5.62652e-15	1.26085e-18	1.26424e-18	0.00371867	0.00656332	1.51361e-14	1.70805e-14
		0.0305772	1.32522e-08	3.25143e-16	3.28958e-16	0.665065	3.85217e-07	1.3286e-07	1.73297e-07	0.304357	3.44097e-07	1.87535e-10	3.08524e-10		0.00595542	0.00077375	1.34362e-08	1.34401e-08	0.00385452	2.3441e-09	7.52444e-10	7.52467e-10	0.322266	0.66715	1.4739e-07	1.4947e-07
		0.240134	9.31704e-09	5.5689e-24	2.2312e-26	0.100199	4.22885e-08	2.7515e-18	5.88902e-19	0.659667	4.10015e-07	1.43274e-20	7.46161e-21		3.89131e-06	2.8319e-09	8.66099e-17	1.12078e-17	2.99886e-05	4.51866e-12	4.70019e-12	5.00948e-12	0.620365	0.379601	8.57846e-10	8.60511e-10
		0.999483	5.72671e-07	5.14774e-09	5.16855e-09	9.46929e-05	6.5483e-11	4.51388e-11	4.51725e-11	0.000422217	3.69396e-10	1.95157e-11	1.95323e-11		1.44705e-06	4.23034e-07	6.4567e-35	2.30787e-35	5.53185e-05	4.7774e-11	4.02092e-17	2.44943e-17	0.264261	0.735682	6.71764e-18	7.59546e-19
		0.998614	1.97839e-11	8.90901e-18	2.19656e-20	2.26883e-05	7.32012e-13	6.48316e-17	1.10619e-17	0.00136378	5.19712e-11	2.01759e-15	3.09233e-16		0.897505	7.78026e-08	1.50362e-19	3.10265e-21	0.0999525	1.74534e-10	5.30109e-11	7.15419e-12	0.00229687	0.000245774	1.0782e-15	1.59771e-15
		0.999713	1.80622e-07	4.27881e-25	1.31801e-25	0.000175467	9.87371e-11	6.86395e-18	8.61594e-18	0.000111376	6.5824e-11	4.51434e-20	5.56498e-20		0.331011	0.0502272	4.90171e-37	4.91063e-37	0.136868	6.28973e-08	5.64908e-31	5.65789e-31	0.137079	0.344815	1.83998e-31	1.84275e-31
		0.999043	3.88601e-08	1.81896e-14	1.58254e-14	0.000712737	1.42413e-10	1.98583e-11	1.65041e-11	0.000243881	5.5644e-11	8.38697e-13	6.86009e-13		1.71862e-06	2.74756e-07	1.96891e-17	1.97365e-17	0.000439785	2.52292e-10	9.71246e-10	8.28016e-10	0.39016	0.609398	1.81884e-07	9.96723e-08
		0.617085	3.73748e-09	2.58336e-15	8.21942e-16	0.0846401	5.77904e-09	1.82914e-11	8.10858e-12	0.298275	3.80173e-08	9.05625e-11	4.03133e-11		0.000998533	0.000434299	1.5714e-41	4.88055e-53	0.0471552	1.7112e-07	2.42082e-34	4.82481e-41	0.105113	0.846298	6.06402e-35	1.57083e-42
		0.999998	5.62016e-08	2.65693e-11	4.86309e-15	6.23166e-07	2.77572e-13	3.97653e-14	8.41424e-15	1.35515e-06	1.02736e-12	6.02926e-15	2.98024e-15		0.086194	0.0201736	4.67478e-08	4.67505e-08	0.164466	9.08643e-08	8.29271e-08	8.29286e-08	0.279988	0.449178	2.46674e-08	2.46679e-08
		0.932942	1.06744e-07	1.44428e-12	1.4459e-12	0.0464048	3.53634e-08	1.00081e-12	1.00172e-12	0.0206531	2.10065e-08	4.96342e-15	4.96888e-15		2.25821e-07	9.89047e-08	1.51883e-43	1.30965e-43	3.65993e-08	2.74958e-14	1.1577e-26	1.1612e-26	0.249877	0.750123	2.6076e-18	5.54832e-20
		0.926064	1.76057e-08	1.06035e-17	9.00595e-18	0.0551559	1.86531e-08	1.16104e-13	1.37437e-13	0.0187801	1.11897e-08	4.33454e-14	4.33728e-14		5.47643e-11	6.47933e-12	1.2657e-16	1.26618e-16	1.47896e-13	3.59089e-20	8.82708e-20	8.82716e-20	0.391808	0.608191	9.80029e-08	9.80041e-08
		0.48117	2.04819e-07	2.62248e-36	2.62729e-36	0.395454	3.60316e-07	8.29806e-21	8.31192e-21	0.123375	1.35609e-07	1.33543e-24	1.33764e-24		2.06008e-07	1.59998e-08	6.78747e-17	6.9131e-17	2.9718e-19	1.50482e-25	3.51714e-25	3.62143e-25	0.447519	0.55248	7.973e-08	6.69583e-08
		0.860941	4.2057e-09	1.10211e-19	1.6232e-24	0.0113818	1.74228e-09	1.55147e-12	3.14997e-15	0.127677	1.69585e-08	4.98227e-16	1.82133e-19		0.999961	7.51405e-07	2.2003e-24	3.44838e-25	3.79065e-05	2.64896e-14	2.81872e-15	1.04625e-17	3.77552e-07	3.61365e-07	7.54342e-22	1.53759e-22
		0.85171	1.02719e-07	1.38755e-09	1.86868e-09	0.14659	9.44135e-08	4.4256e-07	4.83577e-07	0.00169908	1.42988e-09	6.97275e-09	6.97673e-09		0.263221	0.00399414	3.37346e-12	2.86596e-13	0.0662042	3.91564e-09	5.91452e-08	1.71008e-09	0.545366	0.121215	9.75009e-09	6.84223e-10
		0.985324	6.12519e-08	2.51567e-15	5.82238e-16	0.000233376	1.58892e-10	4.71389e-12	4.62875e-12	0.0144426	1.4798e-08	9.87292e-13	1.00669e-12		0.0242962	0.00314775	8.49223e-10	8.49638e-10	0.00467308	2.71548e-09	1.00363e-09	1.00379e-09	0.376702	0.59118	4.44414e-09	4.44493e-09
		0.999852	1.14196e-07	1.03868e-13	1.04183e-13	0.000111405	7.53447e-11	1.33461e-13	1.33569e-13	3.69527e-05	2.97987e-11	1.3159e-14	1.31693e-14		0.00158143	0.000316429	4.06201e-30	2.09989e-30	0.00436757	2.20451e-09	6.3245e-15	3.43127e-16	0.526636	0.467098	2.7426e-14	2.34957e-17
		0.987038	1.7156e-08	3.32643e-15	8.04819e-16	0.0114177	3.70606e-09	3.21191e-11	9.052e-12	0.00154428	1.26512e-09	1.2489e-16	5.64583e-17		0.00230861	0.000749783	1.47466e-27	1.47897e-27	0.733733	6.59158e-07	2.57684e-10	3.12875e-10	0.0820081	0.1812	1.08718e-16	6.73856e-18
		0.405419	9.53359e-08	2.13239e-16	1.46408e-16	0.594544	9.0189e-07	6.29002e-07	6.34621e-07	3.49856e-05	9.16253e-11	1.75064e-12	2.49296e-12		2.00933e-09	5.75741e-10	7.13437e-42	7.14974e-42	1.34057e-07	2.17218e-13	9.27402e-30	9.30083e-30	0.248465	0.751534	1.0146e-22	1.19323e-22
		0.995334	3.60538e-08	2.79799e-14	1.0054e-14	0.0026717	1.13066e-09	6.98363e-11	5.05702e-11	0.00199462	1.73928e-09	2.32683e-13	2.32791e-13		5.30628e-17	1.01591e-17	3.93476e-29	5.48864e-29	2.92251e-14	3.4246e-20	3.85852e-22	3.89448e-22	0.318732	0.681268	3.75202e-08	2.74828e-08
		0.980213	6.3369e-08	3.16571e-31	3.17223e-31	0.0103989	6.76356e-09	5.20386e-23	5.2119e-23	0.00938776	8.12434e-09	1.70437e-23	1.70713e-23		2.76142e-06	1.92323e-06	1.06925e-24	1.07453e-24	0.00203835	2.03894e-09	5.11837e-16	7.76083e-16	0.218649	0.779308	8.3388e-17	8.41698e-17
		0.279498	8.85219e-09	2.61379e-12	2.99698e-12	0.000106552	3.00394e-11	2.29865e-12	2.34226e-12	0.720396	3.47717e-07	4.58507e-10	4.58841e-10		9.02583e-12	5.47109e-13	6.09366e-31	4.16304e-31	2.84703e-10	9.38139e-18	8.16679e-27	9.14456e-28	0.468641	0.531359	2.062e-18	6.07774e-23
		0.0197698	2.91206e-09	2.79743e-23	2.80099e-23	0.746015	5.00754e-07	1.01642e-07	1.01698e-07	0.234214	1.01503e-07	6.992e-09	7.01963e-09		6.21959e-10	1.23654e-10	1.31813e-24	1.32422e-24	1.05974e-12	7.53481e-19	3.29331e-22	3.2999e-22	0.182611	0.817389	3.96579e-17	4.33153e-17
		0.996352	1.04863e-08	3.84695e-16	5.53356e-16	0.00364527	1.10467e-09	6.89747e-12	9.14868e-12	2.58653e-06	1.10389e-12	1.12212e-17	1.42938e-17		0.0243772	0.00641815	1.52997e-45	1.07987e-54	0.0343295	2.35904e-08	1.5972e-27	2.86038e-34	0.407272	0.527603	2.58289e-24	1.43974e-34
		0.76664	1.3706e-07	4.58389e-37	5.67135e-37	0.130397	1.54173e-07	1.33585e-34	1.33743e-34	0.102962	1.66145e-07	2.64194e-34	2.64522e-34		0.22521	0.00525064	3.06929e-41	7.59291e-43	0.266349	5.53738e-08	3.13175e-30	2.06223e-30	0.188879	0.314312	7.39848e-32	2.57913e-32
		0.563763	5.55734e-11	5.91101e-17	4.17566e-20	0.42738	5.34956e-08	4.25252e-07	1.43378e-07	0.0088567	8.13372e-10	2.92034e-11	1.28442e-11		0.0774124	0.00582957	4.48635e-10	1.84571e-10	0.380172	2.10707e-07	4.03328e-07	4.42388e-07	0.221643	0.314941	3.28696e-08	3.58556e-08
		0.860769	1.22412e-07	1.2628e-09	1.26344e-09	0.117764	7.12771e-08	1.46039e-07	1.46045e-07	0.0214657	1.85809e-08	1.06664e-08	1.06672e-08		0.155929	0.024633	2.14527e-16	2.15809e-16	0.113956	8.81064e-08	1.06215e-15	1.1703e-15	0.222469	0.483013	1.1872e-16	1.31369e-16
		0.999981	1.56415e-07	2.9746e-15	2.98664e-15	1.91252e-05	1.15656e-11	1.47947e-13	1.48056e-13	8.20122e-08	6.02266e-14	1.45782e-20	1.45856e-20		0.198736	0.0385199	3.67337e-11	4.55585e-11	0.016688	1.2051e-08	5.73377e-09	5.73514e-09	0.258735	0.487321	5.10385e-10	5.10524e-10
		0.990527	1.34252e-07	3.64367e-18	5.25267e-18	0.00928305	1.84969e-09	1.42926e-14	1.69015e-14	0.000189402	6.53355e-11	2.34074e-17	3.04989e-17		0.685807	0.000202402	1.00539e-21	1.12414e-30	0.313971	3.96226e-09	7.10795e-13	1.75633e-18	1.12565e-05	8.00394e-06	5.16613e-24	4.99835e-28
		0.617406	7.44848e-08	1.78949e-19	1.76219e-21	0.2898	2.21646e-07	2.51622e-16	3.5333e-18	0.0927937	7.86163e-08	2.2356e-17	2.97505e-20		0.000987529	0.000828459	5.90386e-28	5.92379e-28	0.00010564	5.81401e-11	7.44914e-24	7.469e-24	0.370657	0.627421	2.41952e-21	2.78791e-21
		0.999985	4.51705e-10	8.29409e-18	3.95135e-18	3.80491e-06	1.67914e-12	1.93188e-17	1.93325e-17	1.16619e-05	4.81424e-12	3.28756e-17	3.29068e-17		2.73813e-10	3.4339e-11	6.68787e-28	9.46268e-28	0.985789	3.46972e-07	3.09727e-11	4.92547e-11	0.00295576	0.0112546	1.89798e-16	1.93932e-16
		0.999996	2.6975e-08	4.14494e-07	1.46749e-08	3.22259e-06	1.97559e-12	9.07089e-12	1.01167e-11	8.8143e-11	5.05087e-17	9.29061e-17	4.95439e-17		2.32211e-06	2.15295e-08	6.32023e-32	9.27528e-32	0.0112544	5.98362e-09	1.2543e-18	1.2704e-18	0.428516	0.560228	2.74347e-18	2.77536e-18
		0.996614	6.98276e-08	1.73089e-21	3.31695e-22	0.00290607	1.25187e-09	1.06028e-13	1.1099e-13	0.00047951	2.63179e-10	5.69053e-15	6.089e-15		0.143709	0.0925937	5.91404e-43	5.28665e-43	0.0638789	1.05111e-07	1.03202e-39	1.03351e-39	0.110939	0.58888	5.77906e-42	5.78724e-42
		0.903859	3.09468e-07	7.21717e-46	3.25106e-46	0.0921697	1.61595e-07	1.17196e-40	1.03139e-41	0.00397039	8.27675e-09	2.17656e-43	2.09184e-45		4.31176e-08	8.30581e-09	3.55675e-39	4.0163e-39	2.35972e-06	1.91645e-12	1.78199e-21	2.04306e-21	0.280789	0.719209	1.4932e-23	1.7305e-23
		0.789929	7.76033e-08	4.30312e-08	4.67989e-08	0.146676	9.5391e-08	2.29919e-07	2.29924e-07	0.0633936	4.83996e-08	6.91498e-08	6.91537e-08		0.00259534	5.70672e-05	2.69841e-28	4.33165e-28	0.465402	6.67429e-09	1.91278e-20	1.40028e-20	0.459965	0.0719808	3.83147e-22	5.09556e-22
		0.00787007	7.26384e-14	1.81281e-23	4.04561e-26	0.992107	2.12491e-09	1.90444e-11	1.34406e-12	2.29138e-05	2.98371e-12	7.28651e-20	8.37441e-20		0.00266805	0.000681858	9.74531e-14	9.75155e-14	0.00351326	2.78369e-09	1.00448e-09	1.00457e-09	0.352847	0.640289	2.15067e-09	2.15102e-09
		0.99999	2.58789e-07	1.93377e-21	1.94903e-21	9.24928e-06	6.74989e-11	3.2693e-18	3.28736e-18	2.74504e-09	3.15608e-15	4.6435e-27	4.65659e-27		0.793029	0.100911	2.30484e-06	2.57092e-06	0.000324517	1.84417e-10	1.62199e-10	1.62206e-10	0.0594514	0.0462793	2.51345e-08	2.51368e-08
		0.998492	1.05644e-07	8.52113e-07	1.0435e-06	0.00150552	9.9848e-10	4.21411e-10	4.26645e-10	1.69595e-09	1.27742e-15	3.30347e-15	3.49737e-15		0.000185429	1.10987e-20	1.87096e-31	6.23393e-37	0.717573	3.57959e-15	5.42897e-16	1.69275e-17	0.282242	7.67563e-10	2.89019e-19	1.44273e-21
		0.99997	1.8468e-09	1.36865e-17	1.69644e-20	2.06919e-05	3.51831e-13	1.4489e-15	4.70588e-18	9.36134e-06	3.26664e-13	5.02684e-16	1.77434e-18		3.46517e-05	2.24037e-05	1.78695e-43	1.79044e-43	0.000340544	3.99305e-10	6.43662e-30	8.41541e-30	0.206166	0.793436	9.33317e-28	5.02209e-28
		0.986639	1.37884e-07	1.02135e-18	1.0233e-18	0.00968052	9.48362e-09	6.02525e-17	6.03223e-17	0.00368042	3.49592e-09	6.63112e-19	6.63849e-19		2.09836e-05	3.4713e-06	2.76408e-42	2.76843e-42	1.05984e-05	8.59113e-12	1.64611e-31	1.64802e-31	0.336709	0.663256	5.38563e-27	5.39156e-27
		0.000126863	5.61122e-12	4.54344e-28	8.70275e-29	0.12221	1.80071e-08	5.17779e-11	4.38193e-11	0.877663	1.77353e-08	2.0215e-12	1.19059e-13		2.06834e-05	2.52367e-06	2.46194e-11	2.46248e-11	2.80497e-07	9.17488e-14	2.77074e-13	2.77095e-13	0.50635	0.493626	2.32123e-07	2.32147e-07
		0.998709	1.23917e-07	9.8268e-18	1.53984e-18	0.000760611	5.17707e-10	1.00594e-13	1.00683e-13	0.000530597	4.68978e-10	2.27853e-15	2.28112e-15		4.77226e-13	6.16437e-13	7.71013e-74	7.72148e-74	5.84438e-13	1.77039e-18	6.04908e-66	6.05754e-66	0.00037262	0.999627	9.53711e-39	2.72312e-41
		0.699229	4.78982e-10	1.0644e-24	5.2113e-29	0.290296	9.13159e-10	1.10378e-18	1.23835e-23	0.010475	7.14706e-11	3.49095e-20	4.6651e-26		0.0442982	0.112902	1.00683e-40	1.71863e-41	0.0123547	8.7677e-08	4.68669e-36	4.81476e-36	0.0229735	0.807471	6.81094e-37	7.70453e-37
		0.0395083	1.03045e-13	1.20081e-24	3.85802e-35	0.209778	3.13289e-10	1.38965e-13	5.59537e-18	0.750714	2.01458e-09	7.04882e-18	6.54224e-20		0.180834	0.0756014	4.01011e-46	4.01661e-46	0.0358184	1.77448e-07	1.66641e-35	1.66877e-35	0.144722	0.563024	4.64638e-40	4.65229e-40
		0.103437	7.46714e-09	4.63854e-27	6.02046e-27	0.0472817	2.22323e-08	1.81333e-19	1.81769e-19	0.849281	7.6256e-07	2.26227e-22	2.26956e-22		0.828009	0.153926	4.98876e-23	5.00842e-23	0.0176944	1.7062e-08	1.13616e-18	1.13976e-18	0.000102198	0.000268296	1.75706e-22	1.7604e-22
		0.872682	6.89937e-08	9.96929e-08	2.497e-08	0.0650438	3.89703e-08	1.76393e-07	1.97426e-07	0.0622656	5.36665e-07	3.72539e-06	3.72911e-06		0.132121	0.105353	9.83411e-31	6.71903e-31	0.629164	6.55099e-07	3.97942e-17	4.0021e-17	0.0326412	0.100721	1.27848e-21	1.28402e-21
		0.780212	1.08662e-07	1.60976e-21	1.41453e-21	0.138162	1.03907e-07	1.68583e-15	1.68668e-15	0.0816259	7.13409e-08	4.62532e-18	5.22982e-18		0.303688	0.00574165	4.38089e-50	1.29871e-54	0.229362	7.1625e-10	5.86542e-34	6.94406e-45	0.454587	0.00662116	6.03783e-40	7.8088e-47
		0.999999	1.63639e-09	1.03953e-14	1.83011e-15	3.49858e-07	2.25231e-13	1.34859e-14	1.34895e-14	8.10818e-07	5.84212e-13	1.87786e-14	1.87868e-14		3.28304e-06	4.33871e-06	3.20285e-62	6.35594e-63	2.32931e-06	6.90158e-10	4.13528e-52	4.97484e-52	0.150573	0.849417	1.36058e-44	6.62986e-46
		0.997918	9.48697e-09	6.42431e-14	6.59521e-14	0.00145491	1.08565e-09	2.52166e-11	2.53555e-11	0.000627226	1.79121e-10	8.4619e-14	1.11093e-13		7.20504e-11	3.10417e-11	4.67627e-46	4.69144e-46	8.4725e-10	2.4197e-14	1.64944e-39	1.65655e-39	0.177121	0.822879	9.9421e-31	1.19499e-30
		0.846267	2.15607e-08	8.26476e-20	2.67584e-22	0.124042	4.39632e-08	1.33879e-16	5.6499e-18	0.0296908	5.05709e-09	4.57058e-21	5.37884e-23		8.35166e-05	0.00152281	3.01373e-65	3.01852e-65	2.86949e-06	8.43788e-09	9.01245e-51	9.02704e-51	0.00137137	0.997019	2.5173e-49	2.76954e-49
		0.999046	1.90644e-08	3.47924e-07	9.77918e-08	0.000950435	2.26029e-10	3.45079e-09	1.49904e-09	3.33908e-06	9.14973e-13	5.30378e-13	3.65315e-13		0.161323	0.0258983	1.96487e-17	2.15374e-17	0.140711	9.97221e-08	1.41114e-15	1.53725e-15	0.234512	0.437556	1.0104e-16	1.09966e-16
		0.962281	1.3524e-09	1.12293e-10	6.79558e-15	0.00058977	6.0234e-11	1.56064e-10	1.569e-11	0.0371289	5.13951e-09	3.97277e-09	3.88758e-10		0.129803	0.0122782	4.26472e-11	2.61531e-12	0.243817	1.32253e-07	1.94336e-07	1.82959e-07	0.245683	0.368419	3.744e-08	3.57471e-08
															0.139584	0.0182028	7.74604e-33	1.01452e-57	0.159758	9.40671e-08	1.96062e-26	6.16276e-37	0.200066	0.482388	6.79824e-35	3.73873e-41
															0.10978	0.0135623	6.22543e-08	6.83833e-08	0.346437	2.04437e-07	8.07524e-07	8.07689e-07	0.190389	0.339829	1.15446e-07	1.15469e-07
															0.320917	0.0378818	1.23682e-06	1.23944e-06	0.01266	7.12499e-09	3.78296e-08	4.4981e-08	0.246904	0.381634	3.95753e-07	3.9659e-07
															0.136754	6.39274e-08	1.8623e-29	1.01156e-34	0.428542	1.09085e-12	1.10366e-25	8.77413e-31	0.4347	3.70336e-06	3.92305e-26	1.37103e-31
															3.54804e-05	9.94292e-06	2.00431e-32	1.29292e-32	0.438197	4.26387e-07	9.4706e-14	7.00578e-14	0.160403	0.401354	2.55487e-17	6.13728e-18
															9.74353e-05	5.42239e-08	4.19891e-24	1.7655e-27	0.00817525	1.71052e-12	4.24376e-18	3.02496e-22	0.991686	4.09466e-05	5.00395e-17	1.0902e-21
															9.96056e-17	5.18628e-17	4.23216e-56	4.2435e-56	1.2793e-18	1.80395e-24	3.23732e-48	3.24566e-48	0.039855	0.960145	1.4356e-27	1.60183e-27
