# Supplementary material for: Effects of experiencing the COVID-19 pandemic on optimistically biased belief updating
Source: eLife. 2025 Jun 30;13:RP101157. doi: 10.7554/eLife.101157 (PMC12208662; doi:10.7554/eLife.101157)
Supplement: Figure 3—figure supplement 1—source data 1. [file elife-101157-fig3-figsupp1-data1.xlsx]

## Sheet: Figure 3 - figure supplement 1
Figure 3 - figure supplement 1	Parameter recovery
Scaling				Asymmetry
outside		during		outside		during
generating	recovered	generating	recovered	generating	recovered	generating	recovered
0.636265	0.639472	0.335397	0.133236	0.0455084	0.00281949	0.231317	0.00392176
0.970477	0.947342	0.139732	0.387248	0.453786	0.142224	-0.413097	-0.0545652
-0.0819062	-0.207759	0.50071	-0.171974	0.428229	0.0688701	0.769733	0.0387725
1.34037	1.35767	1.07981	0.988639	-0.088891	0.00600907	0.0423376	-0.0367718
0.536981	0.331659	0.41511	0.949397	0.407443	0.0727233	-0.495564	-0.0485328
0.505577	0.792498	0.637882	0.561861	0.121972	0.0130793	0.0711957	0.0287951
0.517853	0.474692	-0.0673838	-0.0148187	-0.059917	-0.0737213	0.150463	0.00415896
0.307452	0.130964	1.31391	0.814195	0.233947	0.0418373	0.444983	0.0432709
0.614843	0.801834	0.653695	0.203603	-0.186041	0.0069641	0.189207	0.00450934
1.38383	1.37636	0.199064	-0.0518134	0.113686	0.0281669	0.266028	0.0115196
-0.0678103	0.12303	1.04572	0.539805	0.14653	0.0265933	0.13935	-0.00424512
-0.246689	-0.0775353	0.333811	0.378472	0.716312	0.084314	-0.0182623	0.00529253
0.942712	0.80573	0.469881	0.61522	0.226823	0.0558061	-0.224384	-0.00447336
-0.208636	-0.235151	-0.617171	-0.0941635	-0.123045	0.00198723	-0.0401272	-0.0205536
0.590279	0.871441	-0.041835	-0.0342771	0.571215	0.0159451	-0.431893	-0.0163943
-0.487071	-0.157045	0.343019	0.987601	-0.180613	-0.0267702	-0.484784	-0.023034
0.695195	0.698641	0.406933	0.310476	-0.301737	-0.0431855	-0.153531	-0.0281331
-0.302588	-0.497188	-0.361345	-0.372225	0.507069	0.0575632	0.204699	0.0299045
0.13329	0.124127	0.646822	0.744403	0.00641661	0.00391332	-0.00809902	-0.00210676
0.805052	0.99564	1.33747	1.26425	-0.384208	-0.0428231	-0.171911	0.010348
-0.0438832	0.210267	0.248436	0.577491	0.23152	0.0188127	0.175964	-0.00407406
-0.0990708	-0.0777624	0.824568	0.934687	0.00535221	0.0261774	-0.0991895	-0.00241509
0.52172	0.722181	0.716193	1.05855	0.380315	0.0630823	-0.244034	0.00146165
0.838373	1.06828	1.61529	1.88227	0.34323	0.0588934	0.108291	0.0165115
0.692961	0.510972	-0.425956	-0.770064	0.132523	0.0397305	0.374814	0.0229897
-0.226821	-0.260544	1.08997	0.984975	0.391844	0.078311	0.344812	-0.0126987
0.635162	0.939335	0.627925	1.02662	0.105761	0.00846391	0.228121	-0.016215
0.33784	0.245854	0.0707055	-0.00362377	-0.0284432	0.00193621	0.0348767	0.00241347
-0.0548205	-0.0295984	1.52441	0.992012	0.585924	0.0442481	0.74518	0.0514028
0.313788	0.549332	0.939057	0.925367	-0.364518	-0.013087	0.441077	0.0363176
0.261445	0.370647	0.953395	1.25253	0.128021	-0.00528457	-0.350706	-0.0131969
-0.0852367	-0.316512	0.894542	0.858093	0.167899	0.0375102	0.450946	0.0289043
-0.121941	-0.0161614	0.0410367	-0.0818134	0.0900151	0.00843699	0.121131	0.0241111
0.146932	0.153732	0.802446	0.797137	0.283446	-0.00887972	0.435618	0.0628099
0.693805	0.902383	0.934647	0.957142	0.139475	0.0111298	0.0772068	0.036433
0.00824425	0.0316791	0.785854	0.84418	-0.0280577	0.0190435	-0.0666237	-0.00781978
0.316663	0.126116	0.345567	0.474883	-0.497779	-0.0326912	0.444798	0.0175617
0.221846	0.28404	1.03379	0.995225	0.14233	0.0125853	-0.0942315	0.00917029
0.0609913	0.438192	0.0577605	0.0120915	0.169299	0.0122643	0.444133	0.0801488
-0.104266	-0.0712526	-0.466261	-0.913636	0.279418	0.0647125	0.382346	0.0487746
0.879591	0.982732	-0.161363	-0.365568	0.534377	0.0461363	0.444456	0.0727009
0.424779	0.07773	-0.367247	-0.374527	-0.198026	-0.0252895	0.11854	0.00150396
1.27076	1.03242	1.42901	1.47272	0.0188999	0.0268865	-0.234157	-0.0112299
0.585198	0.670938	0.562436	0.86838	0.143473	0.00368525	0.533701	0.0698748
0.55802	0.850776	0.474637	0.8957	0.430187	0.0674898	0.375272	0.0236659
1.11076	0.929933	0.412815	0.902763	-0.118965	0.00303855	-0.411733	0.0130153
0.509569	0.848307	0.482569	0.532468	-0.262918	-0.0190927	-0.262585	-0.0285028
0.69006	0.743318	-0.156319	-0.16287	0.310471	0.0457373	-0.0107709	-0.000797577
0.342045	0.375876	0.280175	0.878322	-0.0553468	-0.0489414	-0.0256435	-0.0397772
0.0193196	0.144218	-0.702514	-0.834409	0.427954	0.0820177	0.309535	-0.0089915
0.214639	-0.0206471	-0.63238	-0.802886	0.210821	-0.00400348	0.1156	-0.0242114
0.461491	0.833672	-0.851936	-0.154479	-0.178309	-0.010799	0.211789	0.00580424
0.260983	0.574865	-0.1568	-0.0953616	0.278825	0.0175775	0.494689	0.0430295
0.231758	0.288956	0.790916	0.969744	-0.0600322	0.00785945	0.435881	0.00607526
1.26609	1.12157	0.66493	1.00936	0.0767702	0.00831834	-0.104721	-0.0367823
0.755701	0.850348	0.403184	0.753627	-0.213521	-0.0390156	0.273004	0.0109038
0.263945	0.465424	0.288809	0.361554	0.18031	-0.0406791	0.391181	0.00690872
-0.318019	-0.0358614	0.653466	0.687147	0.0623589	-0.0240126	0.0228432	-0.0175713
		0.598817	-0.0275767			0.317372	0.0111227
		0.0378495	-0.505846			0.210193	0.0128811
		0.875041	0.993207			-0.0677014	0.00814054
		0.605924	0.767661			-0.0168533	0.0038125
		-0.442079	-0.377381			-0.313072	-0.0187469
		0.312597	0.903663			0.213891	0.00797437
		-0.279307	0.412679			0.404032	0.0496884
