# Supplementary material for: Effects of experiencing the COVID-19 pandemic on optimistically biased belief updating
Source: eLife. 2025 Jun 30;13:RP101157. doi: 10.7554/eLife.101157 (PMC12208662; doi:10.7554/eLife.101157)
Supplement: Figure 3—source data 1. [file elife-101157-fig3-data1.xlsx]

## Sheet: Figure 3
Figure 3a	Learning rates				Figure 3b	Parameter recovery				Figure 3c	Parameter comparison
bad news		good news			Scaling		Asymmetry			Scaling		Asymmetry
during	outside	during	outside		generating	recovered	generating	recovered		during	outside	during	outside
0.0164105	0.561691	0.366143	0.612484		-0.00438579	-0.0880412	0.266183	0.0262912		0.191277	0.587088	0.174866	0.0253961
0.0662766	0.745927	0.406776	0.856832		0.710196	0.539671	-0.0517511	0.0077144		0.236526	0.80138	0.170249	0.0554524
0.18868	0.141956	0.192576	0.677569		0.101439	-0.0453876	-0.297618	-0.088541		0.190628	0.409763	0.00194811	0.267806
0.0986407	0.170394	0.0846921	0.808083		-0.184738	-0.429641	-0.157579	-0.0672876		0.0916664	0.489238	-0.00697432	0.318845
0.342707	0.145679	0.459642	0.198746		0.0536221	-0.0954002	0.397696	0.0222587		0.401175	0.172212	0.0584678	0.0265337
0.181965	0.0918996	0.6596	0.439897		0.810019	0.66774	-0.0552598	-0.00305769		0.420783	0.265898	0.238818	0.173999
0.326396	0.412749	0.257518	0.411967		0.510267	0.813761	0.401041	0.0842207		0.291957	0.412358	-0.0344393	-0.000390976
0.611264	0.119779	0.599486	0.219361		-0.378923	-0.444781	-0.053921	0.00955629		0.605375	0.16957	-0.00588904	0.0497907
1.0639	0.605115	0.961164	0.574239		-0.249617	-0.36297	0.200671	-0.0151197		1.01253	0.589677	-0.0513698	-0.0154379
0.243841	0.128812	0.749034	0.266112		0.798706	0.998371	0.541173	0.0362376		0.496437	0.197462	0.252597	0.0686501
0.253247	0.690791	0.13679	0.615598		0.138834	0.110625	-0.283499	-0.0583548		0.195018	0.653194	-0.0582285	-0.0375967
0.206705	0.154447	0.775456	0.706976		-0.185853	-0.244411	0.49738	0.125914		0.491081	0.430712	0.284375	0.276264
0.069679	0.286845	0.106258	0.295977		1.06651	1.59927	0.132014	0.0468093		0.0879686	0.291411	0.0182895	0.00456609
0.554992	0.380805	0.350598	0.521528		0.689324	0.669341	-0.0322849	-0.0255062		0.452795	0.451167	-0.102197	0.0703613
0.084959	0.223239	0.0634126	0.544701		1.27644	1.09249	-0.0254394	0.0183545		0.0741858	0.38397	-0.0107732	0.160731
0.640033	0.48806	0.514944	0.601032		0.00404731	0.150943	-0.579016	-0.107427		0.577489	0.544546	-0.0625449	0.0564856
0.242939	0.472163	0.0968286	0.35309		-0.07649	0.0988454	0.284999	0.059772		0.169884	0.412626	-0.0730554	-0.0595369
1.00496	0.0902839	0.974777	0.315819		0.121467	-0.206794	0.332351	0.0305487		0.98987	0.203051	-0.0150926	0.112767
0.644295	0.116738	0.737342	0.10422		0.493925	0.732969	-0.105717	-0.0401305		0.690819	0.110479	0.0465234	-0.00625885
0.110308	0.123304	0.604536	0.484342		-0.397325	-0.249557	-0.0283831	0.00455104		0.357422	0.303823	0.247114	0.180519
0.479843	0.639728	0.719406	0.656641		-0.145025	0.0907041	-0.0559194	0.00388244		0.599625	0.648185	0.119781	0.00845679
0.702652	0.365485	0.530039	0.459892		0.430442	0.103372	-0.271586	-0.0401776		0.616346	0.412688	-0.0863067	0.0472037
0.156358	0.442673	0.17652	0.463606		0.957102	0.983574	0.656048	0.0947035		0.166439	0.45314	0.0100809	0.0104661
0.265298	0.165439	0.251911	0.411378		-0.026179	0.238214	-0.397162	-0.0591215		0.258604	0.288408	-0.00669376	0.122969
0.148096	0.536896	0.1463	0.520945		0.634977	0.942351	0.0396732	0.00614301		0.147198	0.52892	-0.000898267	-0.00797562
0.548287	0.337988	0.556316	0.49167		1.28096	1.11016	0.0705564	0.00145513		0.552301	0.414829	0.00401414	0.0768411
0.416588	0.119235	0.381803	0.192345		0.394839	0.0900209	0.180727	0.0564933		0.399196	0.15579	-0.0173927	0.0365552
0.177321	0.451914	0.289122	0.622478		0.294565	0.464676	0.0243539	0.00169276		0.233221	0.537196	0.0559005	0.085282
0.451822	0.149496	0.454261	0.149184		0.51004	0.965071	-0.313838	-0.0417293		0.453041	0.14934	0.00121926	-0.000155961
0.0581033	0.320961	0.0595283	0.569044		0.72616	0.802745	-0.284813	-0.0262535		0.0588158	0.445002	0.000712493	0.124041
0.0539964	-0.0069983	0.177293	0.0109687		0.511247	0.866856	0.0323674	0.0126775		0.115645	0.00198521	0.0616484	0.00898351
0.386171	0.103935	0.49725	0.663728		-0.0333493	0.168303	-0.138795	-0.0913118		0.441711	0.383832	0.0555395	0.279896
0.312401	0.473636	0.334792	0.433087		-0.0467751	-0.380269	0.179905	0.04726		0.323597	0.453362	0.0111953	-0.0202744
0.456916	0.530334	0.426922	0.44266		0.113291	0.751682	0.214627	0.0391427		0.441919	0.486497	-0.0149968	-0.0438373
0.240787	0.418744	0.66134	0.445572		0.178882	0.0768601	-0.260744	-0.0544927		0.451064	0.432158	0.210277	0.0134141
0.28162	0.227896	0.279758	0.249234		0.494193	0.238609	-0.00978733	0.0150033		0.280689	0.238565	-0.000931098	0.010669
0.478455	0.112858	0.527743	0.554541		-0.155182	0.115479	-0.312827	-0.0269237		0.503099	0.333699	0.0246436	0.220842
0.257551	0.813672	0.451006	1.12916		0.747374	1.03087	0.166125	0.00402013		0.354279	0.971416	0.0967277	0.157744
0.061861	0.303829	0.0540905	0.380095		-0.485033	-0.549715	0.172883	0.013303		0.0579758	0.341962	-0.00388526	0.0381328
0.178193	0.0916264	0.201889	0.0939161		0.81843	0.669451	0.212917	-0.00701958		0.190041	0.0927713	0.0118482	0.00114483
0.398182	0.722685	0.53103	0.715278		-0.263275	-0.313909	0.211772	0.00602875		0.464606	0.718982	0.0664243	-0.00370322
0.309734	0.240881	0.256548	0.691562		1.10893	1.0507	0.165393	0.0470358		0.283141	0.466221	-0.0265934	0.22534
0.971216	0.580616	1.00878	0.398375		0.966409	0.780931	0.0523319	0.0392731		0.989998	0.489495	0.0187825	-0.0911207
0.0861407	0.979963	0.921921	1.01508		-0.0730411	0.145652	0.454486	0.105974		0.504031	0.997519	0.41789	0.0175567
0.109605	0.295763	0.0983719	0.639624		1.07696	0.998693	-0.00772142	-0.0407049		0.103988	0.467694	-0.00561651	0.171931
0.0333149	0.33389	0.0660728	0.252578		0.20311	0.390426	0.30807	0.0990201		0.0496938	0.293234	0.016379	-0.0406561
1.12601	0.178582	1.00083	0.291913		0.274778	0.296769	0.105763	0.0365235		1.06342	0.235247	-0.06259	0.0566657
0.0179996	0.335743	0.016374	0.363392		1.27002	1.23756	0.0321867	0.000243271		0.0171868	0.349568	-0.000812804	0.0138243
0.108817	0.318062	0.0861279	0.610214		0.250905	0.390802	0.14596	0.00663855		0.0974725	0.464138	-0.0113446	0.146076
0.0466865	0.15957	0.0477217	0.751828		0.314254	0.245327	0.0353393	-0.0252067		0.0472041	0.455699	0.000517628	0.296129
0.476678	0.184594	0.118404	0.256189		-0.538826	-0.397554	-0.0862413	-0.026543		0.297541	0.220392	-0.179137	0.0357977
0.290912	0.786427	0.273076	0.928531		0.929961	1.0263	-0.0805501	-0.000299384		0.281994	0.857479	-0.00891771	0.0710517
0.0534874	0.098457	0.166818	0.0979737		0.428689	0.893754	0.4447	0.0814553		0.110153	0.0982154	0.0566655	-0.00024166
0.0363047	0.268663	0.0332737	0.654517		0.285079	0.872762	0.252384	0.0559082		0.0347892	0.46159	-0.00151549	0.192927
0.224314	0.44375	0.219308	0.687251		0.169127	0.125742	0.730705	0.152625		0.221811	0.5655	-0.00250327	0.121751
0.0336102	0.279242	0.0239096	0.450177		-0.511407	-0.225169	-0.34897	0.0265534		0.0287599	0.364709	-0.00485027	0.0854674
0.207564	0.862964	0.20502	1.08386		-0.511697	-0.549277	-0.0496813	-0.0236091		0.206292	0.973414	-0.00127217	0.11045
0.283692	0.457454	0.356096	0.873768		0.934077	1.02039	-0.0483331	0.039568		0.319894	0.665611	0.0362017	0.208157
0.0206381		0.0242523			0.0118031	0.0486503	0.246761	0.102157		0.0224452		0.00180711
0.856157		0.868883			0.413858	0.99591	0.606041	0.0894573		0.86252		0.00636305
1.00015		0.995733			0.314265	0.0158763	-0.332129	-0.0193938		0.997941		-0.00220804
0.100053		0.611283			0.36144	0.554441	-0.154309	-0.0407157		0.355668		0.255615
0.260597		0.258907			0.254347	0.492543	-0.730487	-0.058859		0.259752		-0.000845205
0.173928		0.585408			0.0670116	0.0450891	0.396366	0.0783279		0.379668		0.20574
0.176818		0.169795			-0.251507	-0.289865	-0.567527	-0.187108		0.173306		-0.00351178
					0.078521	0.351637	0.294063	0.00278046
					0.0657021	0.233002	-0.407392	-0.133974
					-0.0613287	-0.192768	0.217327	0.147223
					0.300486	-0.15421	0.141669	0.00190018
					0.168667	0.575714	0.306016	0.0138476
					0.887516	0.973361	0.0314876	-0.0209397
					1.23829	1.02391	-0.00850026	0.0335549
					0.0157506	0.156947	0.39946	0.0377581
					-0.0462982	0.263253	-0.00578509	-0.0253456
					-0.157532	0.0189733	0.11184	0.00638829
					0.473857	0.733259	-0.125186	0.0237463
					-0.0900896	0.0210566	0.377777	0.0134498
					1.09317	1.61092	-0.113795	0.00366466
					1.08155	1.1467	-0.00444168	-0.0224177
					0.270502	0.0534185	-0.158668	0.00265105
					0.773283	1.00012	0.141794	0.0155381
					1.43042	1.72017	-0.620571	-0.052758
					0.387137	0.53281	0.350342	0.0356239
					1.01183	0.98577	0.561058	0.0298484
					0.991392	0.726045	0.607917	0.117568
					0.842119	0.981251	-0.411411	-0.0458904
					0.113121	0.0340249	0.763937	0.188724
					-0.126773	-0.31193	-0.153634	0.014881
					1.46886	1.46009	-0.0868471	-0.0175195
					0.0800076	0.00897897	0.0541117	-0.00451638
					0.831528	0.92026	0.0614176	0.0178145
					1.60373	1.70336	0.0958091	-0.00904241
					-0.178757	-0.0370237	0.0408036	-0.031196
					0.634048	0.757412	0.681134	0.058999
					0.719498	0.957475	-0.215667	-0.0389062
					-0.998087	-0.856734	0.358388	0.0789685
					1.48085	1.8194	0.171049	0.0198892
					0.351764	0.0670714	0.0872318	0.0111152
					0.155098	0.0633738	-0.0143349	0.044202
					0.115343	0.0735476	-0.239992	-0.00267347
					-0.0010337	0.131299	0.484637	0.117818
					-0.0715879	-0.0700212	0.187881	0.0756536
					0.640813	0.652788	0.399523	0.0539768
					1.36614	1.5643	0.118811	0.0114903
					0.153749	-0.181633	-0.22516	-0.0471082
					0.181545	0.31238	-0.50918	-0.0916674
					0.612664	0.466046	0.13073	-0.00189184
					1.18701	1.05195	-0.0346697	-0.0176136
					-0.380662	-0.0669933	-0.147201	-0.0152744
					0.304891	0.282953	-0.248038	0.00329861
					0.493702	0.413652	-0.0677872	0.0280989
					-0.159597	-0.287132	0.364317	0.0212724
					0.701106	0.347093	0.115157	0.000613086
					0.758349	0.948941	0.550255	0.123639
					-0.233678	-0.292926	0.0494388	-0.00954785
					-0.10109	0.0190172	0.195437	0.00499491
					-0.0742055	0.0968999	0.296889	0.0550783
					0.571006	0.701523	0.306138	0.0193061
					0.61355	0.74139	-0.102366	-0.0098089
					-0.0586449	-0.103145	-0.0114916	0.0132477
					0.529383	0.343657	0.0599957	0.00189193
					0.793085	1.09837	-0.390776	-0.137596
					0.649056	0.915306	-0.119286	-0.0209294
